# Supplementary material
Source: PubMed Central journal article supplement (PMC1348015)
Supplement: pnas_0510466103_2.pdf [file pnas_0510466103_2.pdf]

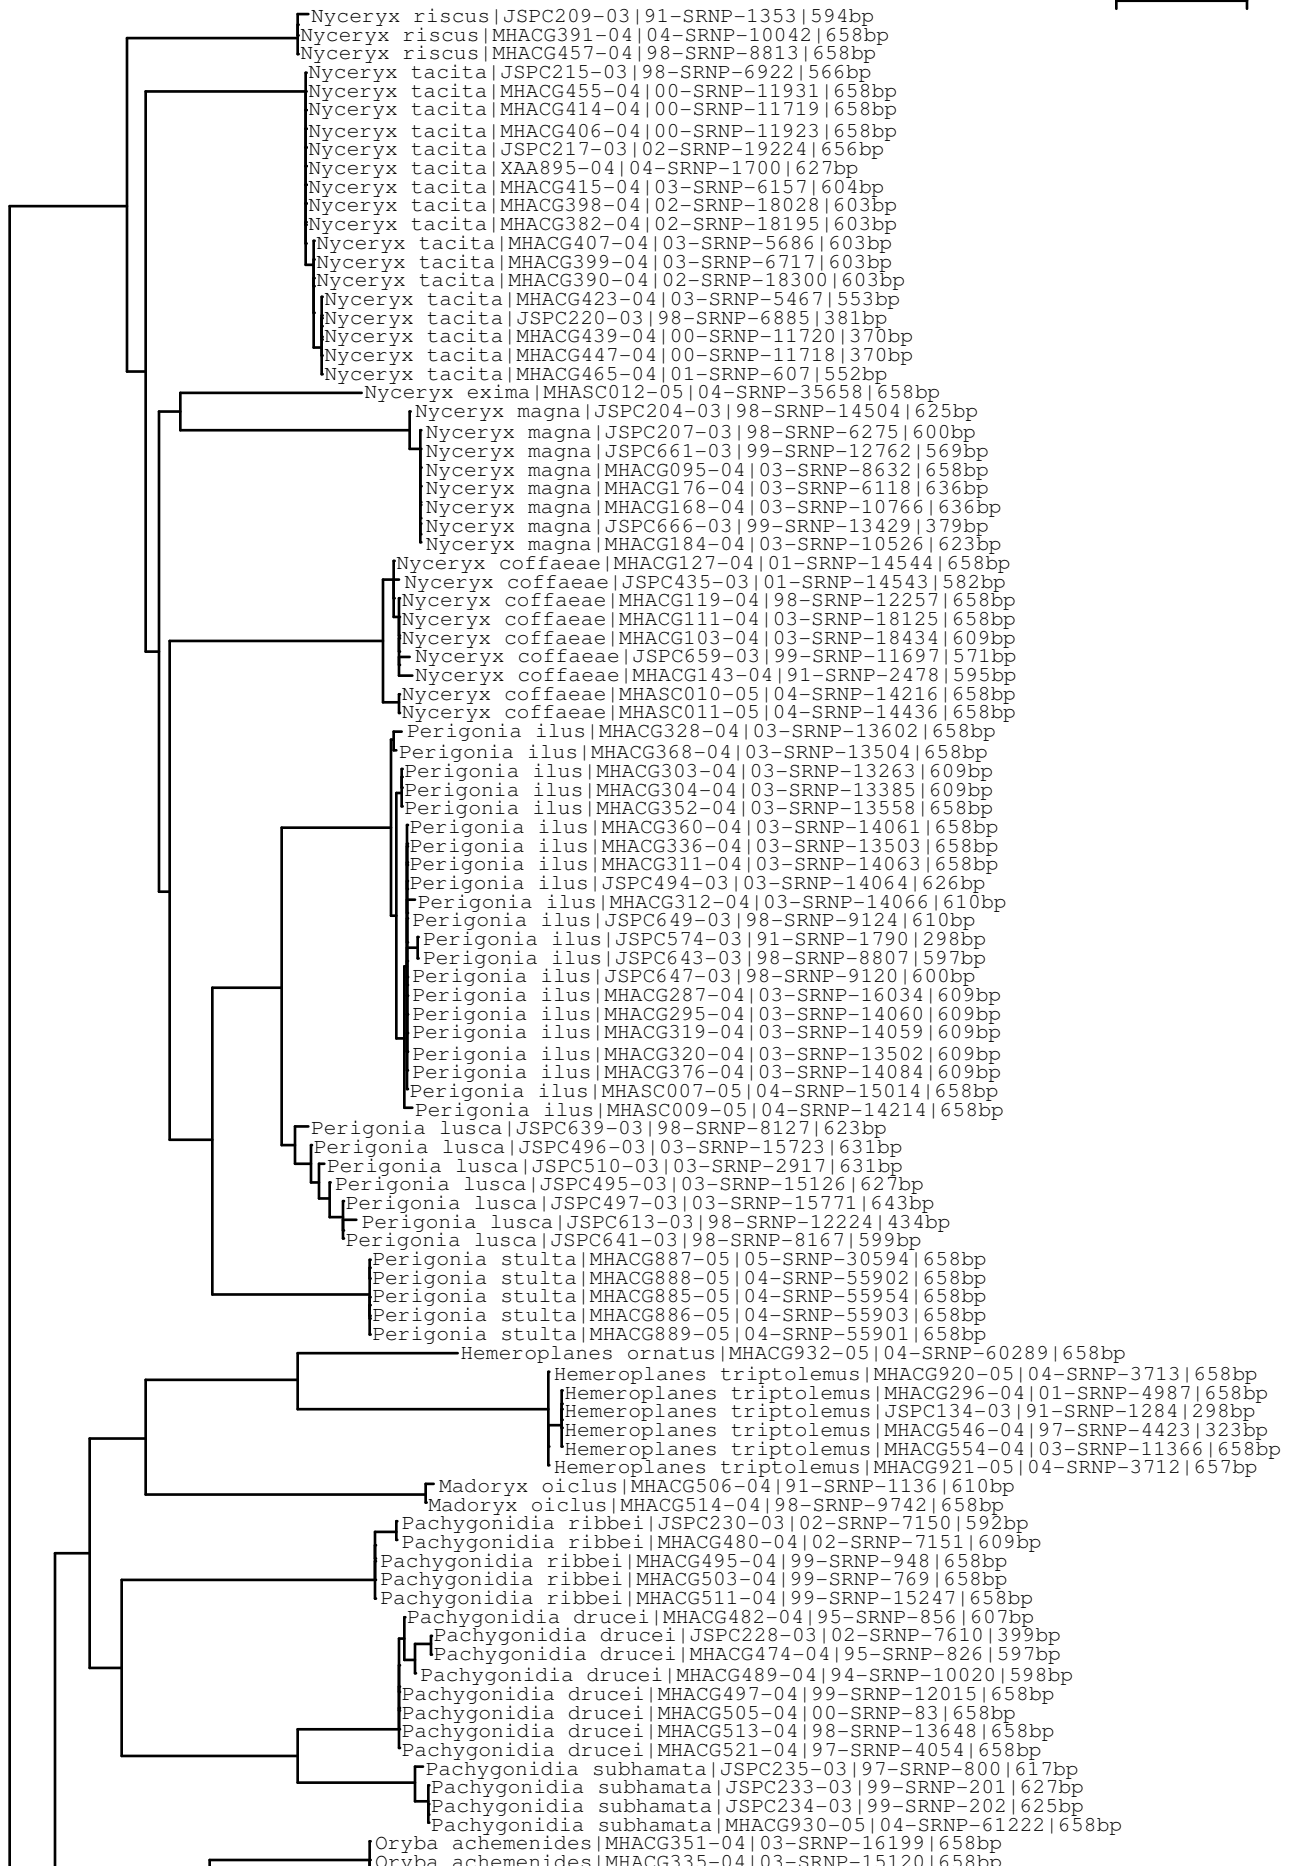

Pachygonidia subhamata|MHACG930-05|04-SRNP-61222|658bp

Oryba achemenides|MHACG351-04|03-SRNP-16199|658bp  
Oryba achemenides|MHACG335-04|03-SRNP-15120|658bp  
Oryba achemenides|MHACG327-04|03-SRNP-19342|658bp  
Oryba achemenides|JSPC502-03|03-SRNP-16591|646bp  
Oryba achemenides|JSPC509-03|03-SRNP-2914|642bp  
Oryba achemenides|MHACG343-04|03-SRNP-15125|610bp  
Oryba achemenides|MHASC048-05|04-SRNP-22728|616bp  
Oryba kadeni|MHACG927-05|04-SRNP-55990|658bp  
Oryba kadeni|MHACG926-05|04-SRNP-55808|658bp  
Oryba kadeni|MHACG925-05|04-SRNP-55957|658bp  
Oryba kadeni|MHASC035-05|04-SRNP-33124|658bp  
Oryba kadeni|MHACG924-05|04-SRNP-55818|658bp  
Oryba kadeni|MHACG928-05|04-SRNP-55958|658bp  
Pachylioides resumens|MHACG313-04|83-SRNP-1003A|605bp  
Pachylioides resumens|MHACG367-04|97-SRNP-10034|613bp  
Pachylioides resumens|MHACG297-04|98-SRNP-14971|658bp  
Pachylioides resumens|MHACG289-04|98-SRNP-14973|658bp  
Pachylioides resumens|MHACG359-04|97-SRNP-10033|609bp  
Pachylioides resumens|MHACG329-04|89-SRNP-192|407bp  
Pachylioides resumens|MHACG363-04|91-SRNP-1916|605bp  
Pachylioides resumens|MHACG879-05|04-SRNP-4004|658bp  
Pachylioides resumens|MHACG880-05|04-SRNP-3715|658bp  
Pachylia syces|MHACG512-04|01-SRNP-15287|658bp  
Pachylia syces|JSPC240-03|93-SRNP-2242|601bp  
Pachylia syces|MHACG371-04|00-SRNP-10632|658bp  
Pachylia syces|MHACG520-04|01-SRNP-14708|658bp  
Pachylia syces|MHACG064-04|04-SRNP-22911|658bp  
Pachylia syces|MHACG056-04|04-SRNP-22910|658bp  
Pachylia syces|MHACG528-04|01-SRNP-14694|626bp  
Pachylia syces|MHACG544-04|01-SRNP-14691|658bp  
Pachylia syces|MHACG369-04|03-SRNP-13945|658bp  
Pachylia syces|MHACG496-04|01-SRNP-14689|658bp  
Pachylia syces|MHACG504-04|01-SRNP-14697|658bp  
Pachylia syces|MHACG536-04|01-SRNP-14683|658bp  
Pachylia syces|MHACG552-04|01-SRNP-14688|658bp  
Pachylia syces|MHASC005-05|04-SRNP-14175|658bp  
Isognathus rimosa|JSPC138-03|90-SRNP-2168|485bp  
Isognathus rimosa|MHASC174-05|00-SRNP-18845|658bp  
Isognathus rimosa|MHASC173-05|99-SRNP-9727|658bp  
Isognathus rimosa|MHASC172-05|00-SRNP-4413|658bp  
Isognathus rimosa|MHASC171-05|00-SRNP-19761|658bp  
Isognathus rimosa|MHASC170-05|00-SRNP-18867|658bp  
Isognathus rimosa|MHASC169-05|04-SRNP-13853|658bp  
Isognathus rimosa|MHASC177-05|94-SRNP-9269|565bp  
Isognathus rimosa|MHASC178-05|94-SRNP-6250|566bp  
Erinnyis alope|MHACG412-04|03-SRNP-12349|609bp  
Erinnyis alope|MHACG404-04|03-SRNP-12350|609bp  
Erinnyis alope|MHACG436-04|97-SRNP-11137|658bp  
Erinnyis alope|MHACG420-04|97-SRNP-11154|658bp  
Erinnyis alope|MHACG428-04|97-SRNP-11132|489bp  
Erinnyis alope|JSPC091-03|97-SRNP-3347|400bp  
Erinnyis alope|MHACG444-04|97-SRNP-11133|381bp  
Erinnyis alope|MHACG452-04|97-SRNP-11134|658bp  
Erinnyis ello|MHACG201-04|99-SRNP-742|632bp  
Erinnyis ello|MHACG065-04|00-SRNP-1537|657bp  
Erinnyis ello|MHACG233-04|99-SRNP-667|658bp  
Erinnyis ello|MHACG049-04|03-SRNP-16430|658bp  
Erinnyis ello|MHACG033-04|03-SRNP-23787|658bp  
Erinnyis ello|MHACG225-04|99-SRNP-96|657bp  
Erinnyis ello|MHACG041-04|03-SRNP-10530|609bp  
Erinnyis ello|JSPC098-03|95-SRNP-4492|563bp  
Erinnyis ello|MHACG209-04|98-SRNP-2180|608bp  
Erinnyis ello|MHACG073-04|99-SRNP-668|620bp  
Erinnyis ello|MHACG057-04|00-SRNP-1536|573bp  
Erinnyis ello|MHACG193-04|99-SRNP-773|567bp  
Erinnyis ello|MHACG241-04|95-SRNP-7698|614bp  
Erinnyis ello|MHASC033-05|04-SRNP-23883|658bp  
Erinnyis obscura|JSPC103-03|94-SRNP-5254|599bp  
Erinnyis lassauxii|JSPC099-03|99-SRNP-11676|628bp  
Erinnyis crameri|MHACG100-04|97-SRNP-2815|583bp  
Erinnyis crameri|MHACG156-04|97-SRNP-2816|353bp  
Erinnyis oenotrus|MHACG102-04|88-SRNP-63|353bp  
Erinnyis oenotrus|MHACG134-04|89-SRNP-304|363bp  
Phryxus caicus|JSPC251-03|94-SRNP-3466|290bp  
Madoryx bubastus|MHACG562-04|03-SRNP-26712|658bp  
Madoryx plutonius|JSPC146-03|95-SRNP-4624|615bp  
Madoryx plutonius|MHACG522-04|01-SRNP-22429|658bp  
Madoryx plutonius|MHACG530-04|99-SRNP-4532|658bp  
Madoryx plutonius|MHACG538-04|03-SRNP-11544|658bp  
Pseudosphinx tetrico|MHACG803-05|79-SRNP-272.6|361bp  
Pseudosphinx tetrico|MHACG929-05|04-SRNP-15881|658bp  
Eumorpha labruscae|JSPC114-03|87-SRNP-560|606bp  
Eumorpha fasciatus|MHACG107-04|97-SRNP-9831|658bp  
Eumorpha fasciatus|MHACG172-04|99-SRNP-18573|658bp  
Eumorpha fasciatus|MHACG024-04|04-SRNP-2138|609bp  
Eumorpha fasciatus|MHACG099-04|97-SRNP-9752|658bp  
Eumorpha fasciatus|MHACG115-04|97-SRNP-9784|658bp  
Eumorpha fasciatus|MHACG188-04|97-SRNP-9753|658bp  
Eumorpha megaeacus|MHACG079-04|01-SRNP-3718|658bp  
Eumorpha megaeacus|MHACG015-04|01-SRNP-10483|658bp  
Eumorpha megaeacus|MHACG007-04|00-SRNP-94|658bp  
Eumorpha megaeacus|MHACG023-04|98-SRNP-14882|658bp  
Eumorpha megaeacus|MHACG031-04|01-SRNP-10478|658bp  
Eumorpha megaeacus|MHACG039-04|99-SRNP-4367|658bp  
Eumorpha megaeacus|MHACG047-04|98-SRNP-6338|658bp  
Eumorpha megaeacus|MHACG055-04|00-SRNP-87|658bp  
Eumorpha megaeacus|MHACG063-04|00-SRNP-97|658bp  
Eumorpha megaeacus|MHACG071-04|01-SRNP-22175|658bp  
Eumorpha megaeacus|MHACG087-04|01-SRNP-3719|658bp  
Eumorpha satellitia|JSPC122-03|02-SRNP-9758|645bp  
Eumorpha satellitia|MHACG173-04|03-SRNP-15400|635bp

Eumorphia megaeacus|MHACG0877-04|01-SRNP-3719|658bp

Eumorphia satellitia|JSPC122-03|02-SRNP-9758|645bp  
 Eumorphia satellitia|MHACG173-04|03-SRNP-15400|635bp  
 Eumorphia satellitia|MHACG133-04|98-SRNP-8028|658bp  
 Eumorphia satellitia|MHASC045-05|02-SRNP-16193|658bp  
 Eumorphia satellitia|JSPC123-03|02-SRNP-16192|400bp  
 Eumorphia satellitia|MHACG149-04|89-SRNP-528|380bp  
 Eumorphia satellitia|MHASC088-05|89-SRNP-545|431bp  
 Eumorphia satellitia|MHACG141-04|89-SRNP-339|380bp  
 Eumorphia satellitia|MHASC089-05|89-SRNP-380|370bp  
 Eumorphia satellitia|MHACG181-04|03-SRNP-15397|658bp  
 Eumorphia satellitia|MHACG157-04|89-SRNP-163C|375bp  
 Eumorphia satellitia|MHACG165-04|89-SRNP-658|369bp  
 Eumorphia satellitia|MHASC092-05|89-SRNP-827|376bp  
 Eumorphia anchemolus|MHACG147-04|03-SRNP-12186.1|610bp  
 Eumorphia anchemolus|MHACG163-04|03-SRNP-10313|658bp  
 Eumorphia anchemolus|MHACG122-04|90-SRNP-2278|596bp  
 Eumorphia anchemolus|MHACG171-04|99-SRNP-85|658bp  
 Eumorphia anchemolus|XAA855-04|04-SRNP-1813|658bp  
 Eumorphia anchemolus|MHACG179-04|98-SRNP-12258|658bp  
 Eumorphia anchemolus|MHACG123-04|01-SRNP-21086|658bp  
 Eumorphia anchemolus|MHACG131-04|03-SRNP-10100|658bp  
 Eumorphia anchemolus|MHACG139-04|03-SRNP-10312|658bp  
 Eumorphia anchemolus|MHACG155-04|03-SRNP-10101|658bp  
 Eumorphia anchemolus|MHACG187-04|95-SRNP-707|600bp  
 Eumorphia triangulum|MHACG069-04|98-SRNP-3147|658bp  
 Eumorphia triangulum|MHACG053-04|00-SRNP-1238|658bp  
 Eumorphia triangulum|MHACG082-04|03-SRNP-23806|658bp  
 Eumorphia triangulum|MHACG074-04|03-SRNP-23542|658bp  
 Eumorphia triangulum|MHACG070-04|03-SRNP-23760|658bp  
 Eumorphia triangulum|MHACG062-04|03-SRNP-23551|658bp  
 Eumorphia triangulum|MHACG045-04|00-SRNP-929|658bp  
 Eumorphia triangulum|MHACG037-04|00-SRNP-11311|658bp  
 Eumorphia triangulum|MHACG025-04|03-SRNP-23545|658bp  
 Eumorphia triangulum|MHACG017-04|03-SRNP-23543|658bp  
 Eumorphia triangulum|MHACG009-04|03-SRNP-23544|658bp  
 Eumorphia triangulum|MHACG005-04|00-SRNP-11086|658bp  
 Eumorphia triangulum|XAA929-04|99-SRNP-17041|658bp  
 Eumorphia triangulum|MHACG001-04|03-SRNP-23540|658bp  
 Eumorphia triangulum|MHACG078-04|03-SRNP-23538|609bp  
 Eumorphia triangulum|MHACG029-04|00-SRNP-930|632bp  
 Eumorphia triangulum|MHACG013-04|00-SRNP-11362|630bp  
 Eumorphia triangulum|XAA848-04|99-SRNP-1865|602bp  
 Eumorphia triangulum|XAA856-04|99-SRNP-15152|571bp  
 Eumorphia triangulum|XAA913-04|99-SRNP-1867|597bp  
 Eumorphia triangulum|XAA937-04|99-SRNP-17029|604bp  
 Eumorphia triangulum|MHACG086-04|03-SRNP-23537|635bp  
 Eumorphia triangulum|MHACG090-04|03-SRNP-23547|636bp  
 Eumorphia triangulum|MHACG094-04|00-SRNP-11087|658bp  
 Eumorphia triangulum|MHACG061-04|00-SRNP-1089|658bp  
 Eumorphia triangulum|MHACG021-04|00-SRNP-1511|658bp  
 Eumorphia triangulum|XAA864-04|99-SRNP-15224|658bp  
 Eumorphia triangulum|MHASC046-05|04-SRNP-2515|616bp

Eumorphia vitis|MHACG109-04|98-SRNP-8011|658bp  
 Eumorphia vitis|MHACG117-04|98-SRNP-64|623bp  
 Eumorphia vitis|MHACG166-04|98-SRNP-61|658bp  
 Eumorphia vitis|MHACG174-04|98-SRNP-65|658bp  
 Eumorphia vitis|MHACG183-04|97-SRNP-4422|658bp

Cocytius antaeus|MHACG038-04|99-SRNP-354|658bp  
 Cocytius antaeus|MHACG006-04|97-SRNP-9832|658bp  
 Cocytius antaeus|MHACG081-04|01-SRNP-25117|658bp  
 Cocytius duponchel|MHACG011-04|00-SRNP-4272|658bp  
 Cocytius duponchel|MHACG003-04|03-SRNP-8401|658bp  
 Cocytius duponchel|MHACG012-04|90-SRNP-2142|658bp  
 Cocytius duponchel|MHACG027-04|90-SRNP-2197|658bp  
 Cocytius duponchel|MHACG077-04|97-SRNP-4615|658bp  
 Cocytius duponchel|MHACG036-04|97-SRNP-4293|658bp  
 Cocytius duponchel|MHACG019-04|99-SRNP-11682|658bp  
 Cocytius duponchel|JSPC071-03|02-SRNP-6919|621bp  
 Cocytius duponchel|MHACG076-04|02-SRNP-6828|610bp  
 Cocytius duponchel|JSPC070-03|02-SRNP-6918|616bp  
 Cocytius duponchel|MHACG092-04|99-SRNP-847|620bp  
 Cocytius duponchel|MHACG084-04|02-SRNP-6678|603bp  
 Cocytius duponchel|MHACG020-04|90-SRNP-2148|600bp  
 Cocytius duponchel|MHACG044-04|90-SRNP-2060|600bp  
 Cocytius duponchel|MHACG085-04|90-SRNP-2162|600bp  
 Cocytius duponchel|MHACG060-04|01-SRNP-11692|608bp  
 Cocytius duponchel|MHACG028-04|90-SRNP-2245|609bp  
 Cocytius duponchel|MHACG004-04|86-SRNP-193.4|609bp  
 Cocytius duponchel|MHACG052-04|90-SRNP-2143|600bp  
 Cocytius duponchel|MHACG800-05|81-SRNP-293.5|358bp

Cocytius Janzen01|MHACG010-04|03-SRNP-16922|658bp  
 Cocytius Janzen01|MHACG067-04|87-SRNP-1340|610bp  
 Cocytius Janzen01|JSPC074-03|91-SRNP-1132|632bp  
 Cocytius Janzen01|MHACG059-04|90-SRNP-2062|600bp  
 Cocytius Janzen01|MHACG083-04|94-SRNP-9789|600bp  
 Cocytius Janzen02|MHACG002-04|03-SRNP-5921|658bp  
 Cocytius Janzen02|MHACG080-04|04-SRNP-31296|658bp  
 Cocytius Janzen02|MHACG075-04|97-SRNP-1630|658bp  
 Cocytius Janzen02|MHACG051-04|99-SRNP-12311|658bp  
 Cocytius Janzen02|MHACG035-04|99-SRNP-12537|609bp  
 Cocytius Janzen02|MHACG091-04|03-SRNP-6648|638bp

Formerly  
Cocytius lucifer

Neococytius cluentius|MHACG387-04|00-SRNP-20580|658bp  
 Neococytius cluentius|MHACG395-04|01-SRNP-4561|658bp  
 Neococytius cluentius|MHACG379-04|03-SRNP-5524|609bp  
 Neococytius cluentius|JSPC197-03|93-SRNP-1777|311bp  
 Neococytius cluentius|MHACG403-04|99-SRNP-1015|658bp  
 Neococytius cluentius|MHACG468-04|03-SRNP-22392|658bp  
 Neococytius cluentius|MHASC034-05|04-SRNP-22932|658bp

Adhemarius daphne|MHACG306-04|03-SRNP-14302|610bp  
 Adhemarius daphne|MHACG314-04|03-SRNP-14306|610bp  
 Adhemarius daphne|MHACG362-04|98-SRNP-10861|658bp

Adhemarius daphne|MHACG306-04|03-SRNP-14302|610bp  
Adhemarius daphne|MHACG314-04|03-SRNP-14306|610bp  
Adhemarius daphne|MHACG362-04|98-SRNP-10861|658bp  
Adhemarius daphne|MHASC161-05|97-SRNP-4698|658bp  
Adhemarius daphne|MHASC162-05|97-SRNP-6338|658bp  
Adhemarius daphne|MHACG370-04|98-SRNP-5887|658bp  
Adhemarius daphne|MHASC004-05|04-SRNP-14138|658bp  
Adhemarius daphne|MHASC163-05|95-SRNP-6060|658bp  
Adhemarius daphne|MHASC165-05|95-SRNP-6059|658bp  
Adhemarius daphne|MHASC159-05|98-SRNP-5377|658bp  
Adhemarius daphne|MHACG330-04|93-SRNP-3007|593bp  
Adhemarius daphne|MHACG322-04|93-SRNP-2861|603bp  
Adhemarius daphne|MHASC164-05|93-SRNP-3075|562bp  
Adhemarius daphne|MHASC166-05|90-SRNP-1591|577bp  
Adhemarius daphne|MHACG354-04|95-SRNP-6498|617bp  
Adhemarius daphne|MHASC167-05|93-SRNP-2858|613bp  
Adhemarius daphne|MHASC168-05|93-SRNP-3011|581bp  
Adhemarius fulvescens|MHACG338-04|00-SRNP-9344|608bp  
Adhemarius fulvescens|MHACG346-04|99-SRNP-1216|602bp  
Adhemarius fulvescens|MHASC160-05|97-SRNP-1223|658bp  
Adhemarius ypsilon|JSPC016-03|02-SRNP-13571|629bp  
Adhemarius ypsilon|JSPC013-03|02-SRNP-19355|627bp  
Adhemarius ypsilon|JSPC009-03|02-SRNP-9473|650bp  
Adhemarius ypsilon|JSPC012-03|02-SRNP-30004|629bp  
Adhemarius ypsilon|JSPC676-03|95-SRNP-8757|609bp  
Adhemarius ypsilon|JSPC010-03|02-SRNP-18079|643bp  
Adhemarius ypsilon|JSPC011-03|02-SRNP-18278|653bp  
Adhemarius ypsilon|JSPC476-03|01-SRNP-9841|632bp  
Adhemarius ypsilon|JSPC015-03|02-SRNP-27951|615bp  
Adhemarius ypsilon|JSPC014-03|02-SRNP-28792|355bp  
Adhemarius ypsilon|JSPC674-03|81-SRNP-464|326bp  
Adhemarius ypsilon|JSPC677-03|97-SRNP-1538|606bp  
Adhemarius ypsilon|MHASC031-05|04-SRNP-2725|612bp  
Agius cingulata|JSPC027-03|77-SRNP-4|592bp  
Agius cingulata|MHACG232-04|01-SRNP-4591|609bp  
Agius cingulata|MHACG248-04|98-SRNP-8101|573bp  
Aellopos ceculus|JSPC453-03|01-SRNP-4406|626bp  
Aellopos ceculus|JSPC433-03|01-SRNP-1230|625bp  
Aellopos ceculus|JSPC462-03|01-SRNP-4628|626bp  
Aellopos ceculus|JSPC440-03|01-SRNP-1821|617bp  
Aellopos ceculus|JSPC017-03|01-SRNP-4533|644bp  
Aellopos ceculus|JSPC465-03|01-SRNP-5074|607bp  
Aellopos ceculus|JSPC460-03|01-SRNP-4626|626bp  
Aellopos ceculus|JSPC461-03|01-SRNP-4627|624bp  
Aellopos ceculus|JSPC459-03|01-SRNP-4615|624bp  
Aellopos ceculus|JSPC438-03|01-SRNP-1818|625bp  
Aellopos ceculus|JSPC439-03|01-SRNP-1819|623bp  
Aellopos ceculus|JSPC458-03|01-SRNP-4548|617bp  
Aellopos ceculus|JSPC452-03|01-SRNP-4326|622bp  
Aellopos ceculus|JSPC018-03|01-SRNP-4436|606bp  
Aellopos ceculus|JSPC464-03|01-SRNP-4997|611bp  
Aellopos ceculus|JSPC469-03|01-SRNP-900|612bp  
Aellopos fadus|JSPC504-03|03-SRNP-2351|649bp  
Aellopos fadus|JSPC686-04|03-SRNP-22178|573bp  
Aellopos fadus|JSPC685-04|03-SRNP-22177|573bp  
Aellopos fadus|JSPC021-03|87-SRNP-109|499bp  
Aellopos fadus|JSPC559-03|87-SRNP-69|327bp  
Aellopos fadus|JSPC625-03|98-SRNP-4889|430bp  
Aellopos fadus|JSPC692-04|83-SRNP-4894|593bp  
Aellopos clavipes|MHACG272-04|01-SRNP-13902|658bp  
Aellopos clavipes|MHACG191-04|98-SRNP-13759|658bp  
Aellopos clavipes|MHACG207-04|98-SRNP-13760|595bp  
Aellopos clavipes|MHACG280-04|00-SRNP-2705|658bp  
Aellopos titan|MHACG229-04|98-SRNP-3188|658bp  
Aellopos titan|JSPC025-03|02-SRNP-2816|523bp  
Aellopos titan|XAA896-04|04-SRNP-45790|658bp  
Aellopos titan|MHACG261-04|98-SRNP-1743|609bp  
Aellopos titan|MHACG016-04|04-SRNP-22213|610bp  
Aellopos titan|MHACG205-04|00-SRNP-2708|609bp  
Aellopos titan|MHACG245-04|98-SRNP-3185|608bp  
Aellopos titan|JSPC505-03|03-SRNP-2398|627bp  
Aellopos titan|XAA904-04|04-SRNP-46019|658bp  
Aellopos titan|MHACG197-04|03-SRNP-22175|636bp  
Aellopos titan|JSPC688-04|78-SRNP-22|588bp  
Aellopos titan|JSPC687-04|03-SRNP-2749|619bp  
Aellopos titan|JSPC684-04|03-SRNP-22176|573bp  
Aellopos titan|MHACG253-04|98-SRNP-8130|573bp  
Aellopos titan|MHACG290-04|98-SRNP-4882|370bp  
Aellopos titan|MHACG298-04|98-SRNP-3186|603bp  
Eupyrrhoglossum sagra|JSPC129-03|90-SRNP-2242.2|303bp  
Eupyrrhoglossum sagra|MHASC113-05|90-SRNP-930|380bp  
Eupyrrhoglossum sagra|MHACG255-04|03-SRNP-19773|658bp  
Eupyrrhoglossum sagra|XAA871-04|04-SRNP-46897|614bp  
Eupyrrhoglossum sagra|MHACG247-04|03-SRNP-8897|636bp  
Eupyrrhoglossum sagra|MHACG206-04|03-SRNP-31358|624bp  
Eupyrrhoglossum sagra|MHACG198-04|03-SRNP-8898|635bp  
Eupyrrhoglossum sagra|MHASC107-05|82-SRNP-241|575bp  
Eupyrrhoglossum sagra|MHASC108-05|83-SRNP-771|498bp  
Eupyrrhoglossum sagra|MHASC100-05|01-SRNP-14530|658bp  
Eupyrrhoglossum sagra|MHACG922-05|04-SRNP-60974|658bp  
Eupyrrhoglossum sagra|MHACG279-04|03-SRNP-14080|658bp  
Eupyrrhoglossum sagra|MHACG190-04|03-SRNP-14079|617bp  
Eupyrrhoglossum sagra|MHACG263-04|03-SRNP-13757|632bp  
Eupyrrhoglossum sagra|MHASC101-05|01-SRNP-1229|658bp  
Eupyrrhoglossum sagra|MHACG923-05|04-SRNP-42533|658bp  
Eupyrrhoglossum sagra|MHACG271-04|03-SRNP-14172|636bp  
Eupyrrhoglossum sagra|MHASC114-05|89-SRNP-565|573bp  
Eupyrrhoglossum sagra|MHASC116-05|91-SRNP-2186|581bp  
Eupyrrhoglossum sagra|MHASC119-05|98-SRNP-9108|658bp  
Eupyrrhoglossum sagra|MHASC120-05|98-SRNP-9113|658bp  
Eupyrrhoglossum sagra|MHASC117-05|98-SRNP-9144|658bp  
Eupyrrhoglossum sagra|MHASC118-05|98-SRNP-8797|658bp

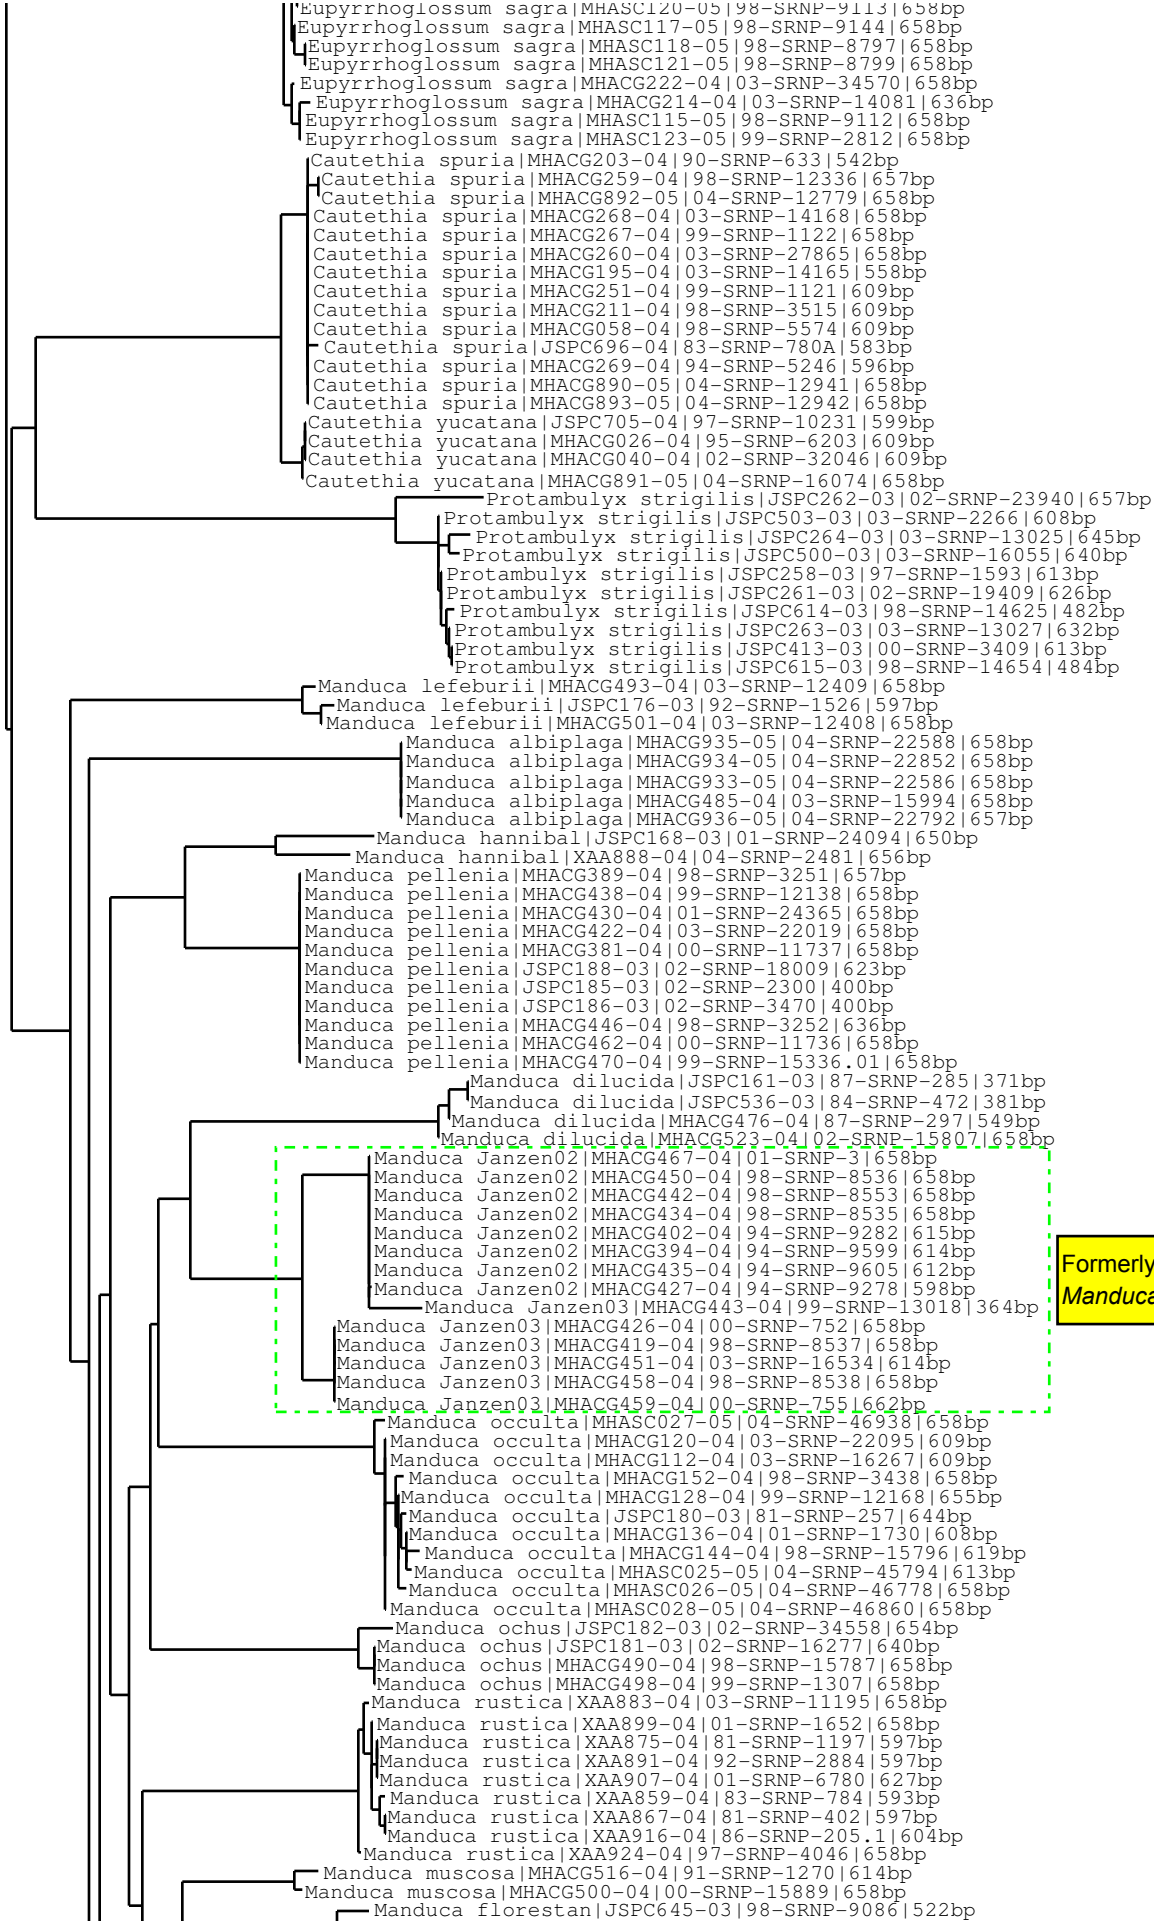

Formerly  
*Manduca sexta*

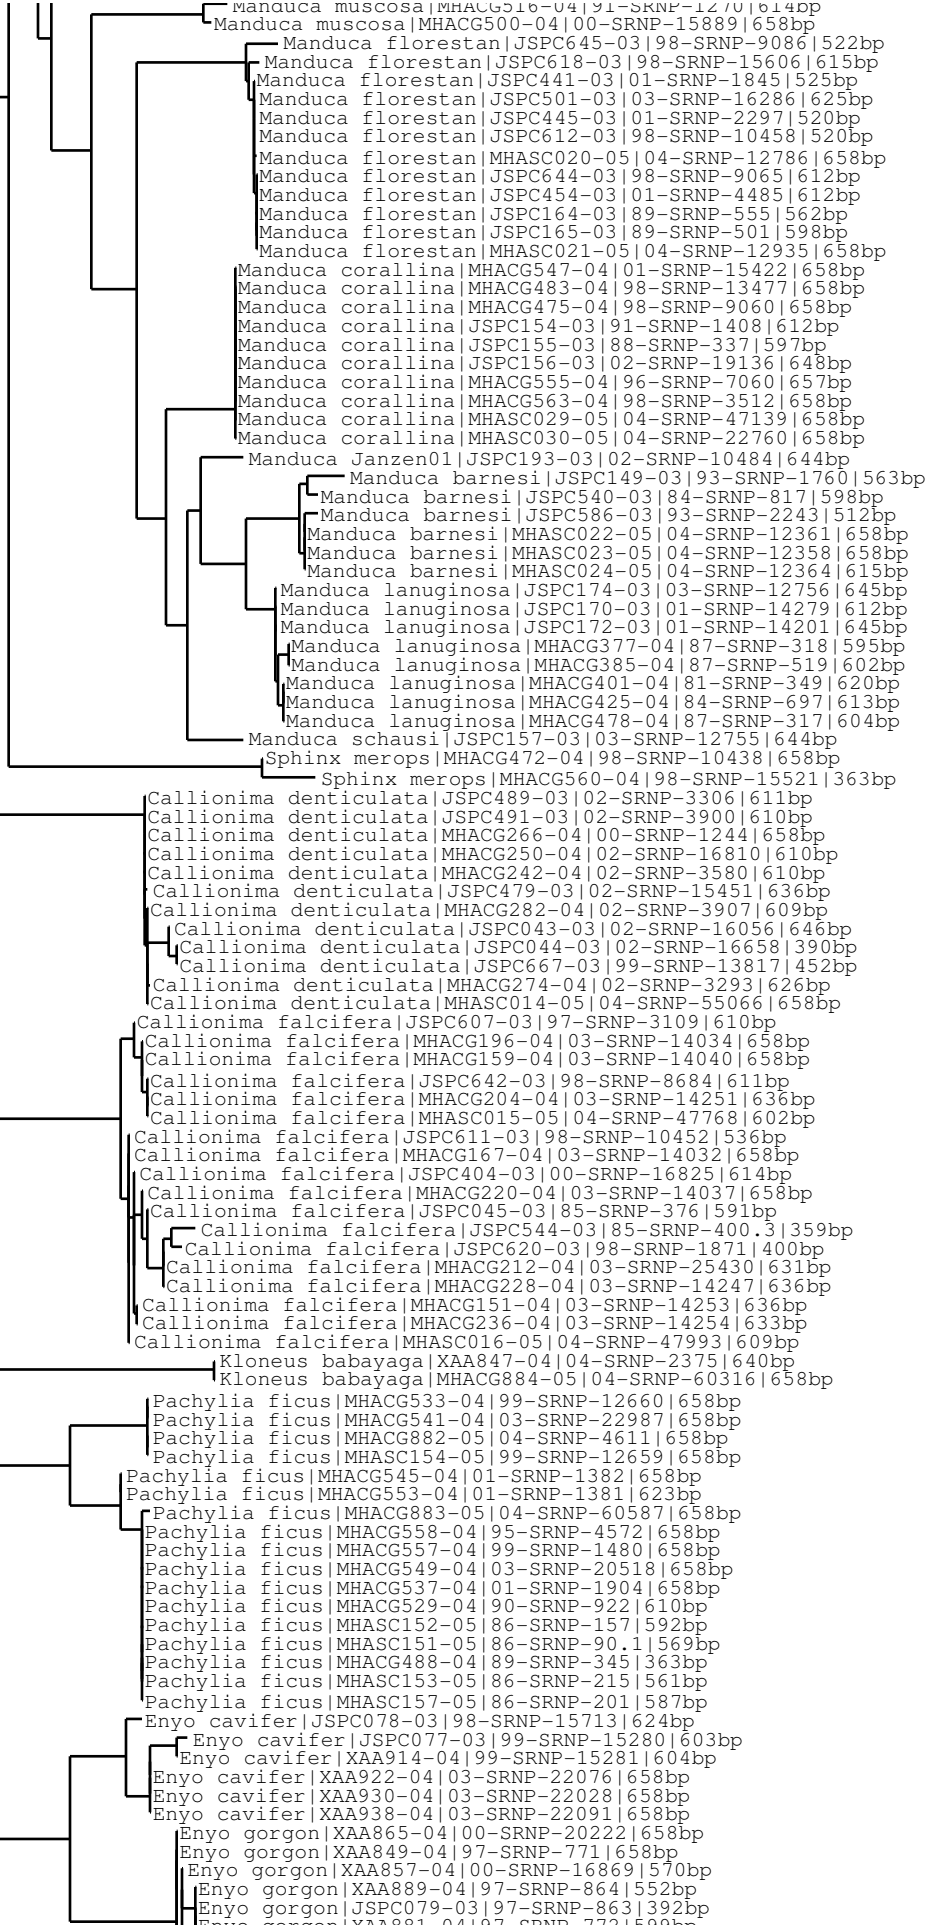

Manduca muscosa|MHACG516-04|91-SRNP-1270|614bp  
Manduca muscosa|MHACG500-04|00-SRNP-15889|658bp  
Manduca florestan|JSPC645-03|98-SRNP-9086|522bp  
Manduca florestan|JSPC618-03|98-SRNP-15606|615bp  
Manduca florestan|JSPC441-03|01-SRNP-1845|525bp  
Manduca florestan|JSPC501-03|03-SRNP-16286|625bp  
Manduca florestan|JSPC445-03|01-SRNP-2297|520bp  
Manduca florestan|JSPC612-03|98-SRNP-10458|520bp  
Manduca florestan|MHASC020-05|04-SRNP-12786|658bp  
Manduca florestan|JSPC644-03|98-SRNP-9065|612bp  
Manduca florestan|JSPC454-03|01-SRNP-4485|612bp  
Manduca florestan|JSPC164-03|89-SRNP-555|562bp  
Manduca florestan|JSPC165-03|89-SRNP-501|598bp  
Manduca florestan|MHASC021-05|04-SRNP-12935|658bp  
Manduca corallina|MHACG547-04|01-SRNP-15422|658bp  
Manduca corallina|MHACG483-04|98-SRNP-13477|658bp  
Manduca corallina|MHACG475-04|98-SRNP-9060|658bp  
Manduca corallina|JSPC154-03|91-SRNP-1408|612bp  
Manduca corallina|JSPC155-03|88-SRNP-337|597bp  
Manduca corallina|JSPC156-03|02-SRNP-19136|648bp  
Manduca corallina|MHACG555-04|96-SRNP-7060|657bp  
Manduca corallina|MHACG563-04|98-SRNP-3512|658bp  
Manduca corallina|MHASC029-05|04-SRNP-47139|658bp  
Manduca corallina|MHASC030-05|04-SRNP-22760|658bp  
Manduca Janzen01|JSPC193-03|02-SRNP-10484|644bp  
Manduca barnesi|JSPC149-03|93-SRNP-1760|563bp  
Manduca barnesi|JSPC540-03|84-SRNP-817|598bp  
Manduca barnesi|JSPC586-03|93-SRNP-2243|512bp  
Manduca barnesi|MHASC022-05|04-SRNP-12361|658bp  
Manduca barnesi|MHASC023-05|04-SRNP-12358|658bp  
Manduca barnesi|MHASC024-05|04-SRNP-12364|615bp  
Manduca lanuginosa|JSPC174-03|03-SRNP-12756|645bp  
Manduca lanuginosa|JSPC170-03|01-SRNP-14279|612bp  
Manduca lanuginosa|JSPC172-03|01-SRNP-14201|645bp  
Manduca lanuginosa|MHACG377-04|87-SRNP-318|595bp  
Manduca lanuginosa|MHACG385-04|87-SRNP-519|602bp  
Manduca lanuginosa|MHACG401-04|81-SRNP-349|620bp  
Manduca lanuginosa|MHACG425-04|84-SRNP-697|613bp  
Manduca lanuginosa|MHACG478-04|87-SRNP-317|604bp  
Manduca schausi|JSPC157-03|03-SRNP-12755|644bp  
Sphinx merops|MHACG472-04|98-SRNP-10438|658bp  
Sphinx merops|MHACG560-04|98-SRNP-15521|363bp  
Callionima denticulata|JSPC489-03|02-SRNP-3306|611bp  
Callionima denticulata|JSPC491-03|02-SRNP-3900|610bp  
Callionima denticulata|MHACG266-04|00-SRNP-1244|658bp  
Callionima denticulata|MHACG250-04|02-SRNP-16810|610bp  
Callionima denticulata|MHACG242-04|02-SRNP-3580|610bp  
Callionima denticulata|JSPC479-03|02-SRNP-15451|636bp  
Callionima denticulata|MHACG282-04|02-SRNP-3907|609bp  
Callionima denticulata|JSPC043-03|02-SRNP-16056|646bp  
Callionima denticulata|JSPC044-03|02-SRNP-16658|390bp  
Callionima denticulata|JSPC667-03|99-SRNP-13817|452bp  
Callionima denticulata|MHACG274-04|02-SRNP-3293|626bp  
Callionima denticulata|MHASC014-05|04-SRNP-55066|658bp  
Callionima falcifera|JSPC607-03|97-SRNP-3109|610bp  
Callionima falcifera|MHACG196-04|03-SRNP-14034|658bp  
Callionima falcifera|MHACG159-04|03-SRNP-14040|658bp  
Callionima falcifera|JSPC642-03|98-SRNP-8684|611bp  
Callionima falcifera|MHACG204-04|03-SRNP-14251|636bp  
Callionima falcifera|MHASC015-05|04-SRNP-47768|602bp  
Callionima falcifera|JSPC611-03|98-SRNP-10452|536bp  
Callionima falcifera|MHACG167-04|03-SRNP-14032|658bp  
Callionima falcifera|JSPC404-03|00-SRNP-16825|614bp  
Callionima falcifera|MHACG220-04|03-SRNP-14037|658bp  
Callionima falcifera|JSPC045-03|85-SRNP-376|591bp  
Callionima falcifera|JSPC544-03|85-SRNP-400.3|359bp  
Callionima falcifera|JSPC620-03|98-SRNP-1871|400bp  
Callionima falcifera|MHACG212-04|03-SRNP-25430|631bp  
Callionima falcifera|MHACG228-04|03-SRNP-14247|636bp  
Callionima falcifera|MHACG151-04|03-SRNP-14253|636bp  
Callionima falcifera|MHACG236-04|03-SRNP-14254|633bp  
Callionima falcifera|MHASC016-05|04-SRNP-47993|609bp  
Kloneus babayaga|XAA847-04|04-SRNP-2375|640bp  
Kloneus babayaga|MHACG884-05|04-SRNP-60316|658bp  
Pachylia ficus|MHACG533-04|99-SRNP-12660|658bp  
Pachylia ficus|MHACG541-04|03-SRNP-22987|658bp  
Pachylia ficus|MHACG882-05|04-SRNP-4611|658bp  
Pachylia ficus|MHASC154-05|99-SRNP-12659|658bp  
Pachylia ficus|MHACG545-04|01-SRNP-1382|658bp  
Pachylia ficus|MHACG553-04|01-SRNP-1381|623bp  
Pachylia ficus|MHACG883-05|04-SRNP-60587|658bp  
Pachylia ficus|MHACG558-04|95-SRNP-4572|658bp  
Pachylia ficus|MHACG557-04|99-SRNP-1480|658bp  
Pachylia ficus|MHACG549-04|03-SRNP-20518|658bp  
Pachylia ficus|MHACG537-04|01-SRNP-1904|658bp  
Pachylia ficus|MHACG529-04|90-SRNP-922|610bp  
Pachylia ficus|MHASC152-05|86-SRNP-157|592bp  
Pachylia ficus|MHASC151-05|86-SRNP-90.1|569bp  
Pachylia ficus|MHACG488-04|89-SRNP-345|363bp  
Pachylia ficus|MHASC153-05|86-SRNP-215|561bp  
Pachylia ficus|MHASC157-05|86-SRNP-201|587bp  
Enyo cavifer|JSPC078-03|98-SRNP-15713|624bp  
Enyo cavifer|JSPC077-03|99-SRNP-15280|603bp  
Enyo cavifer|XAA914-04|99-SRNP-15281|604bp  
Enyo cavifer|XAA922-04|03-SRNP-22076|658bp  
Enyo cavifer|XAA930-04|03-SRNP-22028|658bp  
Enyo cavifer|XAA938-04|03-SRNP-22091|658bp  
Enyo gorgon|XAA865-04|00-SRNP-20222|658bp  
Enyo gorgon|XAA849-04|97-SRNP-771|658bp  
Enyo gorgon|XAA857-04|00-SRNP-16869|570bp  
Enyo gorgon|XAA889-04|97-SRNP-864|552bp  
Enyo gorgon|JSPC079-03|97-SRNP-863|392bp  
Enyo gorgon|XAA881-04|97-SRNP-771|658bp

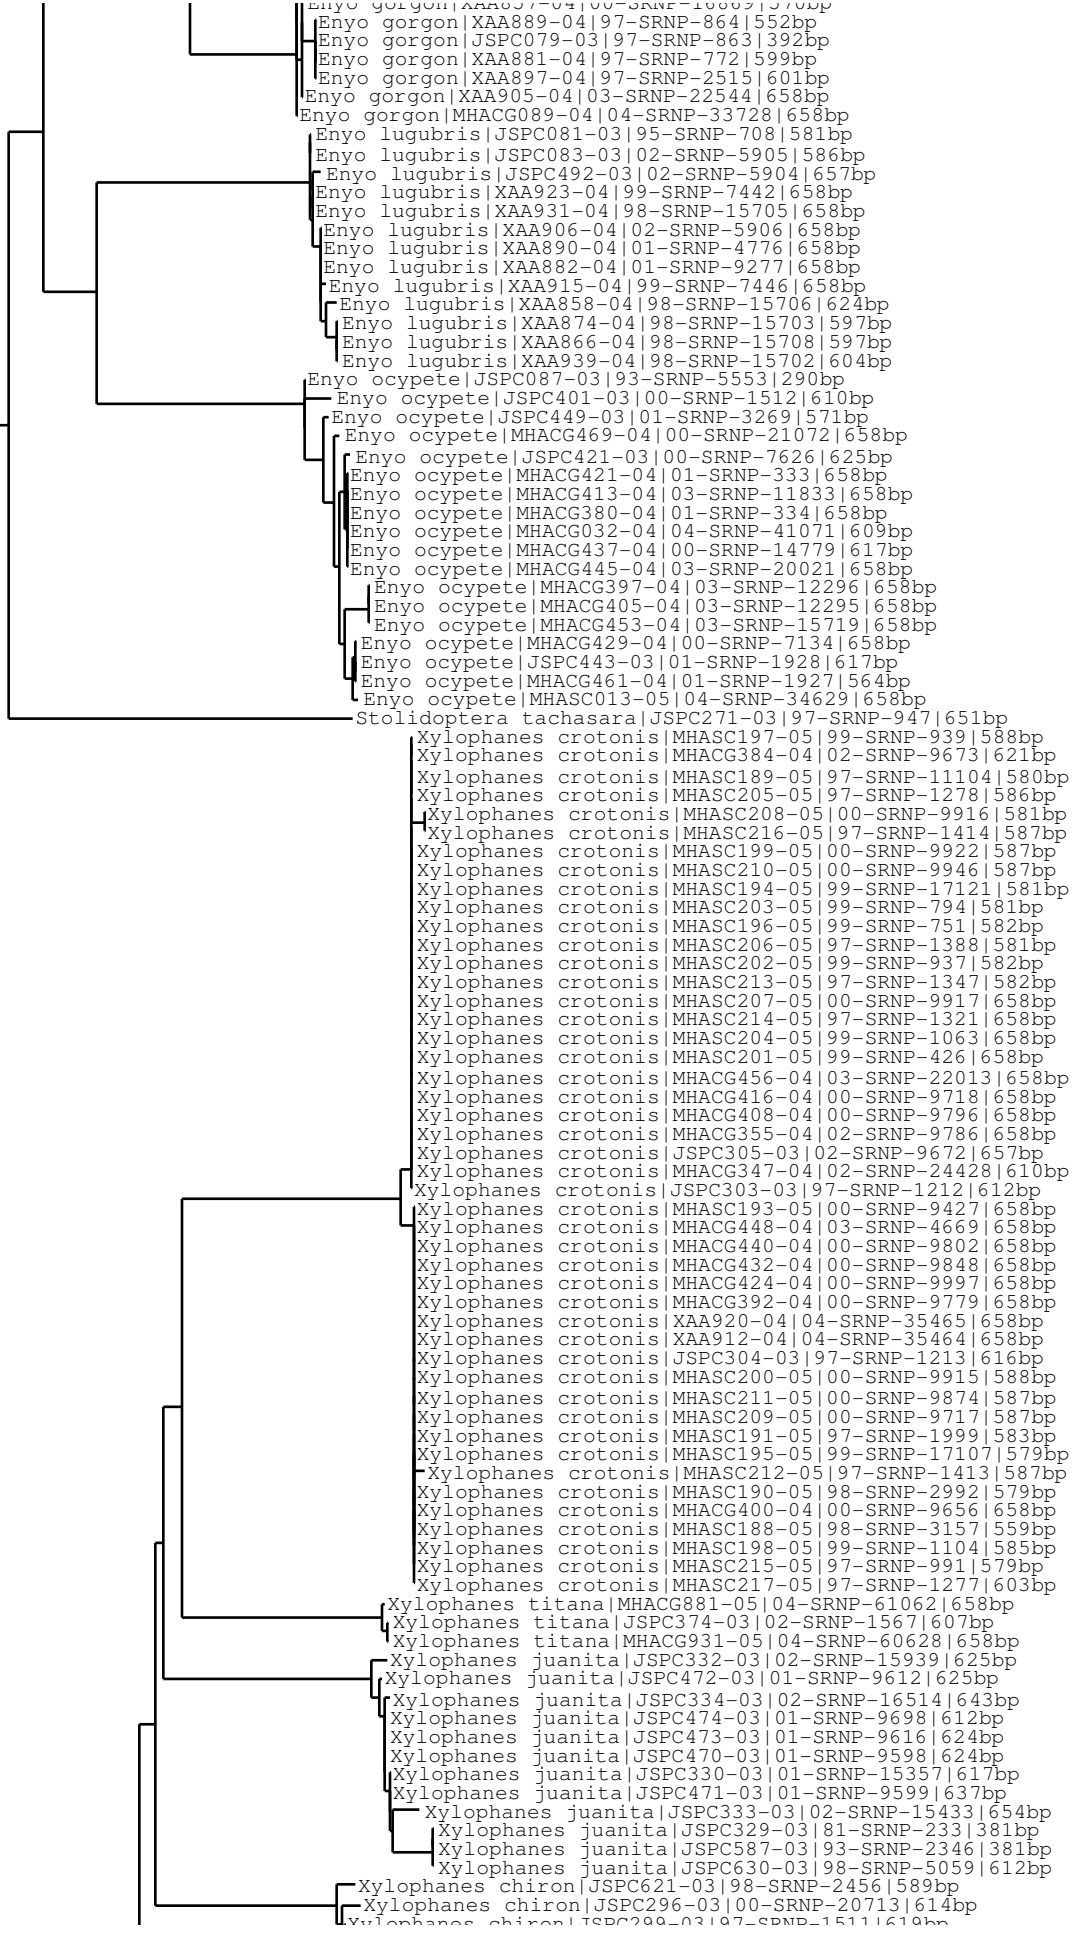



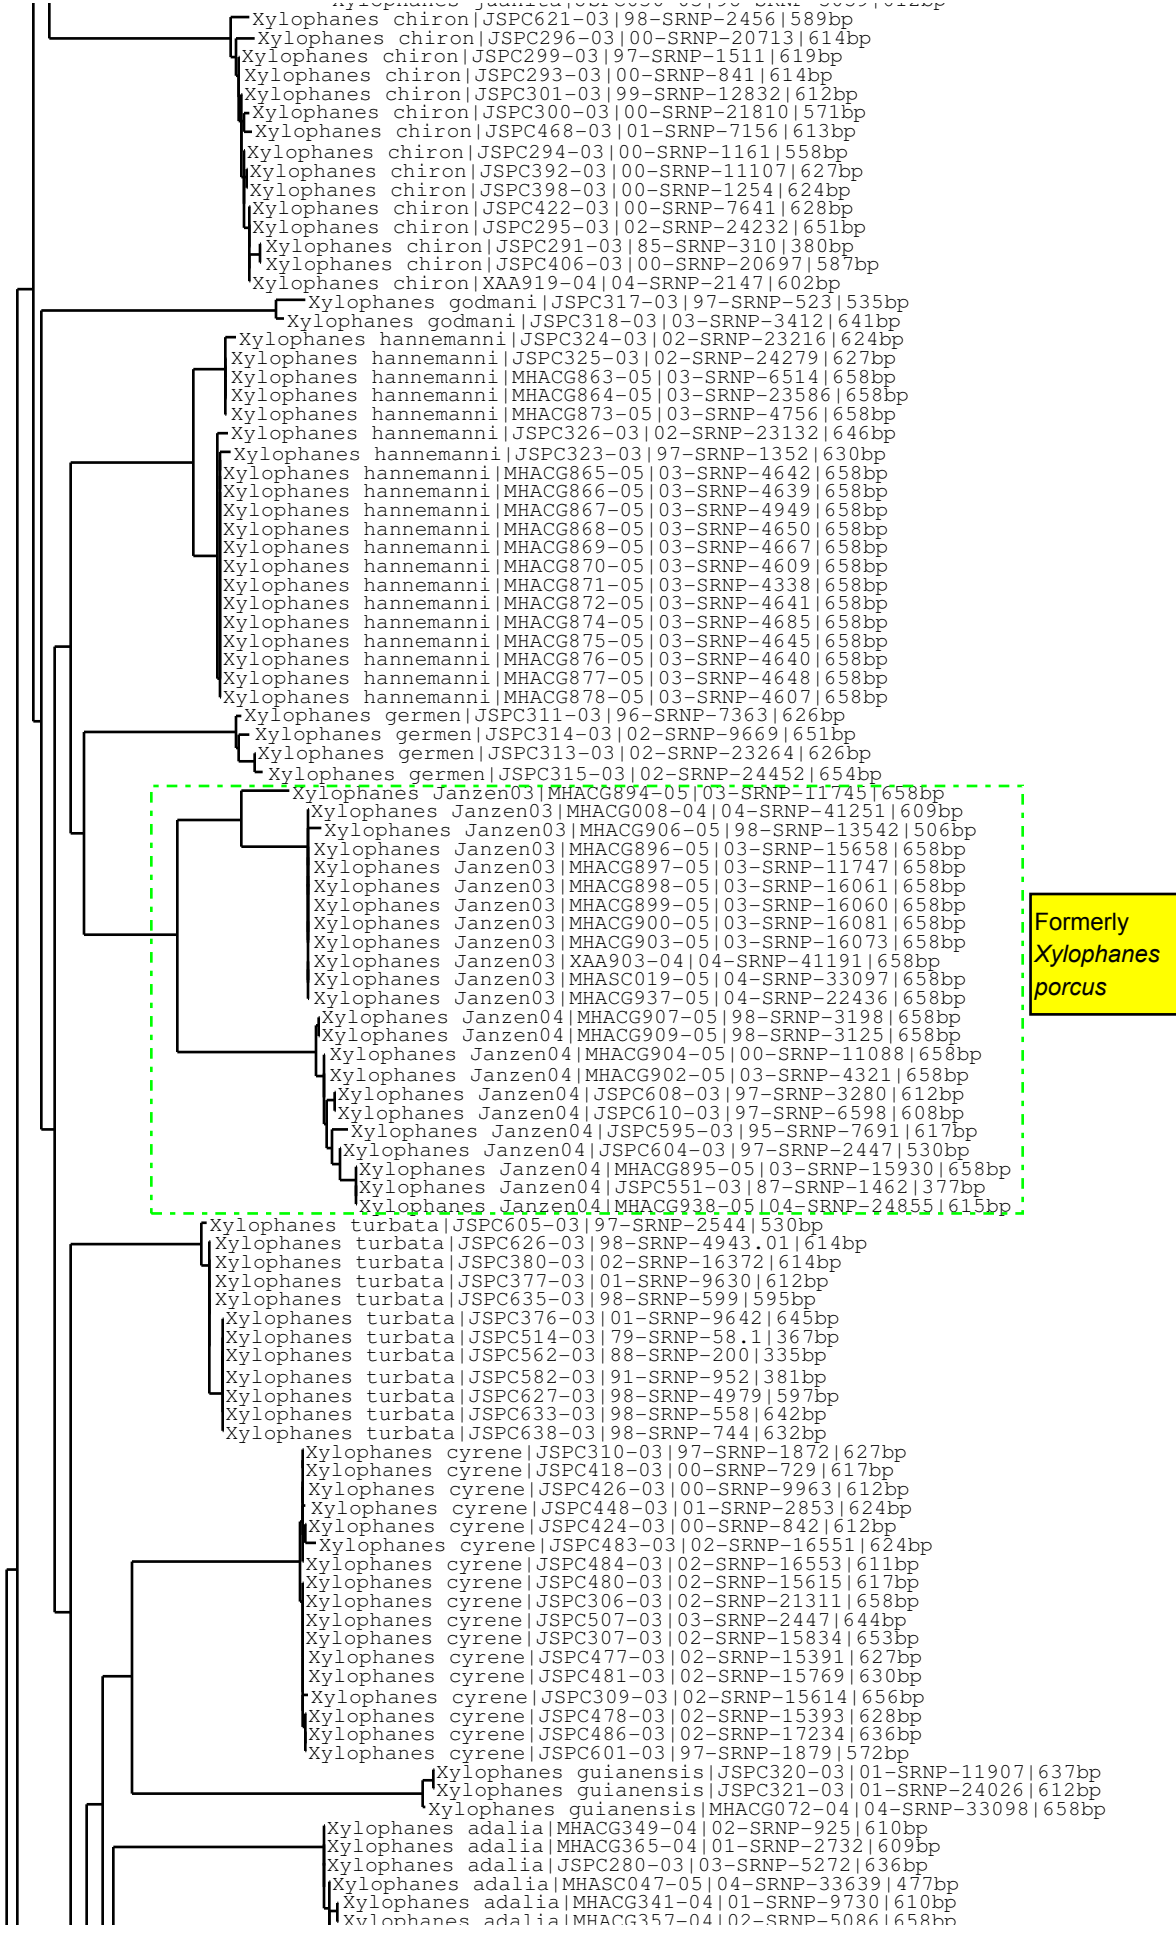

Formerly  
*Xylophanes*  
*porcus*

- Xylophanes chiron|JSPC621-03|98-SRNP-2456|589bp
- Xylophanes chiron|JSPC296-03|00-SRNP-20713|614bp
- Xylophanes chiron|JSPC299-03|97-SRNP-1511|619bp
- Xylophanes chiron|JSPC293-03|00-SRNP-841|614bp
- Xylophanes chiron|JSPC301-03|99-SRNP-12832|612bp
- Xylophanes chiron|JSPC300-03|00-SRNP-21810|571bp
- Xylophanes chiron|JSPC468-03|01-SRNP-7156|613bp
- Xylophanes chiron|JSPC294-03|00-SRNP-1161|558bp
- Xylophanes chiron|JSPC392-03|00-SRNP-11107|627bp
- Xylophanes chiron|JSPC398-03|00-SRNP-1254|624bp
- Xylophanes chiron|JSPC422-03|00-SRNP-7641|628bp
- Xylophanes chiron|JSPC295-03|02-SRNP-24232|651bp
- Xylophanes chiron|JSPC291-03|85-SRNP-310|380bp
- Xylophanes chiron|JSPC406-03|00-SRNP-20697|587bp
- Xylophanes chiron|XAA919-04|04-SRNP-2147|602bp
- Xylophanes godmani|JSPC317-03|97-SRNP-523|535bp
- Xylophanes godmani|JSPC318-03|03-SRNP-3412|641bp
- Xylophanes hannemanni|JSPC324-03|02-SRNP-23216|624bp
- Xylophanes hannemanni|JSPC325-03|02-SRNP-24279|627bp
- Xylophanes hannemanni|MHACG863-05|03-SRNP-6514|658bp
- Xylophanes hannemanni|MHACG864-05|03-SRNP-23586|658bp
- Xylophanes hannemanni|MHACG873-05|03-SRNP-4756|658bp
- Xylophanes hannemanni|JSPC326-03|02-SRNP-23132|646bp
- Xylophanes hannemanni|JSPC323-03|97-SRNP-1352|630bp
- Xylophanes hannemanni|MHACG865-05|03-SRNP-4642|658bp
- Xylophanes hannemanni|MHACG866-05|03-SRNP-4639|658bp
- Xylophanes hannemanni|MHACG867-05|03-SRNP-4949|658bp
- Xylophanes hannemanni|MHACG868-05|03-SRNP-4650|658bp
- Xylophanes hannemanni|MHACG869-05|03-SRNP-4667|658bp
- Xylophanes hannemanni|MHACG870-05|03-SRNP-4609|658bp
- Xylophanes hannemanni|MHACG871-05|03-SRNP-4338|658bp
- Xylophanes hannemanni|MHACG872-05|03-SRNP-4641|658bp
- Xylophanes hannemanni|MHACG874-05|03-SRNP-4685|658bp
- Xylophanes hannemanni|MHACG875-05|03-SRNP-4645|658bp
- Xylophanes hannemanni|MHACG876-05|03-SRNP-4640|658bp
- Xylophanes hannemanni|MHACG877-05|03-SRNP-4648|658bp
- Xylophanes hannemanni|MHACG878-05|03-SRNP-4607|658bp
- Xylophanes germen|JSPC311-03|96-SRNP-7363|626bp
- Xylophanes germen|JSPC314-03|02-SRNP-9669|651bp
- Xylophanes germen|JSPC313-03|02-SRNP-23264|626bp
- Xylophanes germen|JSPC315-03|02-SRNP-24452|654bp
- Xylophanes Janzen03|MHACG894-05|03-SRNP-11745|658bp
- Xylophanes Janzen03|MHACG008-04|04-SRNP-41251|609bp
- Xylophanes Janzen03|MHACG906-05|98-SRNP-13542|506bp
- Xylophanes Janzen03|MHACG896-05|03-SRNP-15658|658bp
- Xylophanes Janzen03|MHACG897-05|03-SRNP-11747|658bp
- Xylophanes Janzen03|MHACG898-05|03-SRNP-16061|658bp
- Xylophanes Janzen03|MHACG899-05|03-SRNP-16060|658bp
- Xylophanes Janzen03|MHACG900-05|03-SRNP-16081|658bp
- Xylophanes Janzen03|MHACG903-05|03-SRNP-16073|658bp
- Xylophanes Janzen03|XAA903-04|04-SRNP-41191|658bp
- Xylophanes Janzen03|MHASCO19-05|04-SRNP-33097|658bp
- Xylophanes Janzen03|MHACG937-05|04-SRNP-22436|658bp
- Xylophanes Janzen04|MHACG907-05|98-SRNP-3198|658bp
- Xylophanes Janzen04|MHACG909-05|98-SRNP-3125|658bp
- Xylophanes Janzen04|MHACG904-05|00-SRNP-11088|658bp
- Xylophanes Janzen04|MHACG902-05|03-SRNP-4321|658bp
- Xylophanes Janzen04|JSPC608-03|97-SRNP-3280|612bp
- Xylophanes Janzen04|JSPC610-03|97-SRNP-6598|608bp
- Xylophanes Janzen04|JSPC595-03|95-SRNP-7691|617bp
- Xylophanes Janzen04|JSPC604-03|97-SRNP-2447|530bp
- Xylophanes Janzen04|MHACG895-05|03-SRNP-15930|658bp
- Xylophanes Janzen04|JSPC551-03|87-SRNP-1462|377bp
- Xylophanes Janzen04|MHACG938-05|04-SRNP-24855|615bp
- Xylophanes turbata|JSPC605-03|97-SRNP-2544|530bp
- Xylophanes turbata|JSPC626-03|98-SRNP-4943.01|614bp
- Xylophanes turbata|JSPC380-03|02-SRNP-16372|614bp
- Xylophanes turbata|JSPC377-03|01-SRNP-9630|612bp
- Xylophanes turbata|JSPC635-03|98-SRNP-5991|595bp
- Xylophanes turbata|JSPC376-03|01-SRNP-9642|645bp
- Xylophanes turbata|JSPC514-03|79-SRNP-58.1|367bp
- Xylophanes turbata|JSPC562-03|88-SRNP-200|335bp
- Xylophanes turbata|JSPC582-03|91-SRNP-952|381bp
- Xylophanes turbata|JSPC627-03|98-SRNP-4979|597bp
- Xylophanes turbata|JSPC633-03|98-SRNP-558|642bp
- Xylophanes turbata|JSPC638-03|98-SRNP-744|632bp
- Xylophanes cyrene|JSPC310-03|97-SRNP-1872|627bp
- Xylophanes cyrene|JSPC418-03|00-SRNP-729|617bp
- Xylophanes cyrene|JSPC426-03|00-SRNP-9963|612bp
- Xylophanes cyrene|JSPC448-03|01-SRNP-2853|624bp
- Xylophanes cyrene|JSPC424-03|00-SRNP-842|612bp
- Xylophanes cyrene|JSPC483-03|02-SRNP-16551|624bp
- Xylophanes cyrene|JSPC484-03|02-SRNP-16553|611bp
- Xylophanes cyrene|JSPC480-03|02-SRNP-15615|617bp
- Xylophanes cyrene|JSPC306-03|02-SRNP-21311|658bp
- Xylophanes cyrene|JSPC507-03|03-SRNP-2447|644bp
- Xylophanes cyrene|JSPC307-03|02-SRNP-15834|653bp
- Xylophanes cyrene|JSPC477-03|02-SRNP-15391|627bp
- Xylophanes cyrene|JSPC481-03|02-SRNP-15769|630bp
- Xylophanes cyrene|JSPC309-03|02-SRNP-15614|656bp
- Xylophanes cyrene|JSPC478-03|02-SRNP-15393|628bp
- Xylophanes cyrene|JSPC486-03|02-SRNP-17234|636bp
- Xylophanes cyrene|JSPC601-03|97-SRNP-1879|572bp
- Xylophanes guianensis|JSPC320-03|01-SRNP-11907|637bp
- Xylophanes guianensis|JSPC321-03|01-SRNP-24026|612bp
- Xylophanes guianensis|MHACG072-04|04-SRNP-33098|658bp
- Xylophanes adalia|MHACG349-04|02-SRNP-925|610bp
- Xylophanes adalia|MHACG365-04|01-SRNP-2732|609bp
- Xylophanes adalia|JSPC280-03|03-SRNP-5272|636bp
- Xylophanes adalia|MHASCO47-05|04-SRNP-33639|477bp
- Xylophanes adalia|MHACG341-04|01-SRNP-9730|610bp
- Xylophanes adalia|MHACG357-04|02-SRNP-5086|658bp



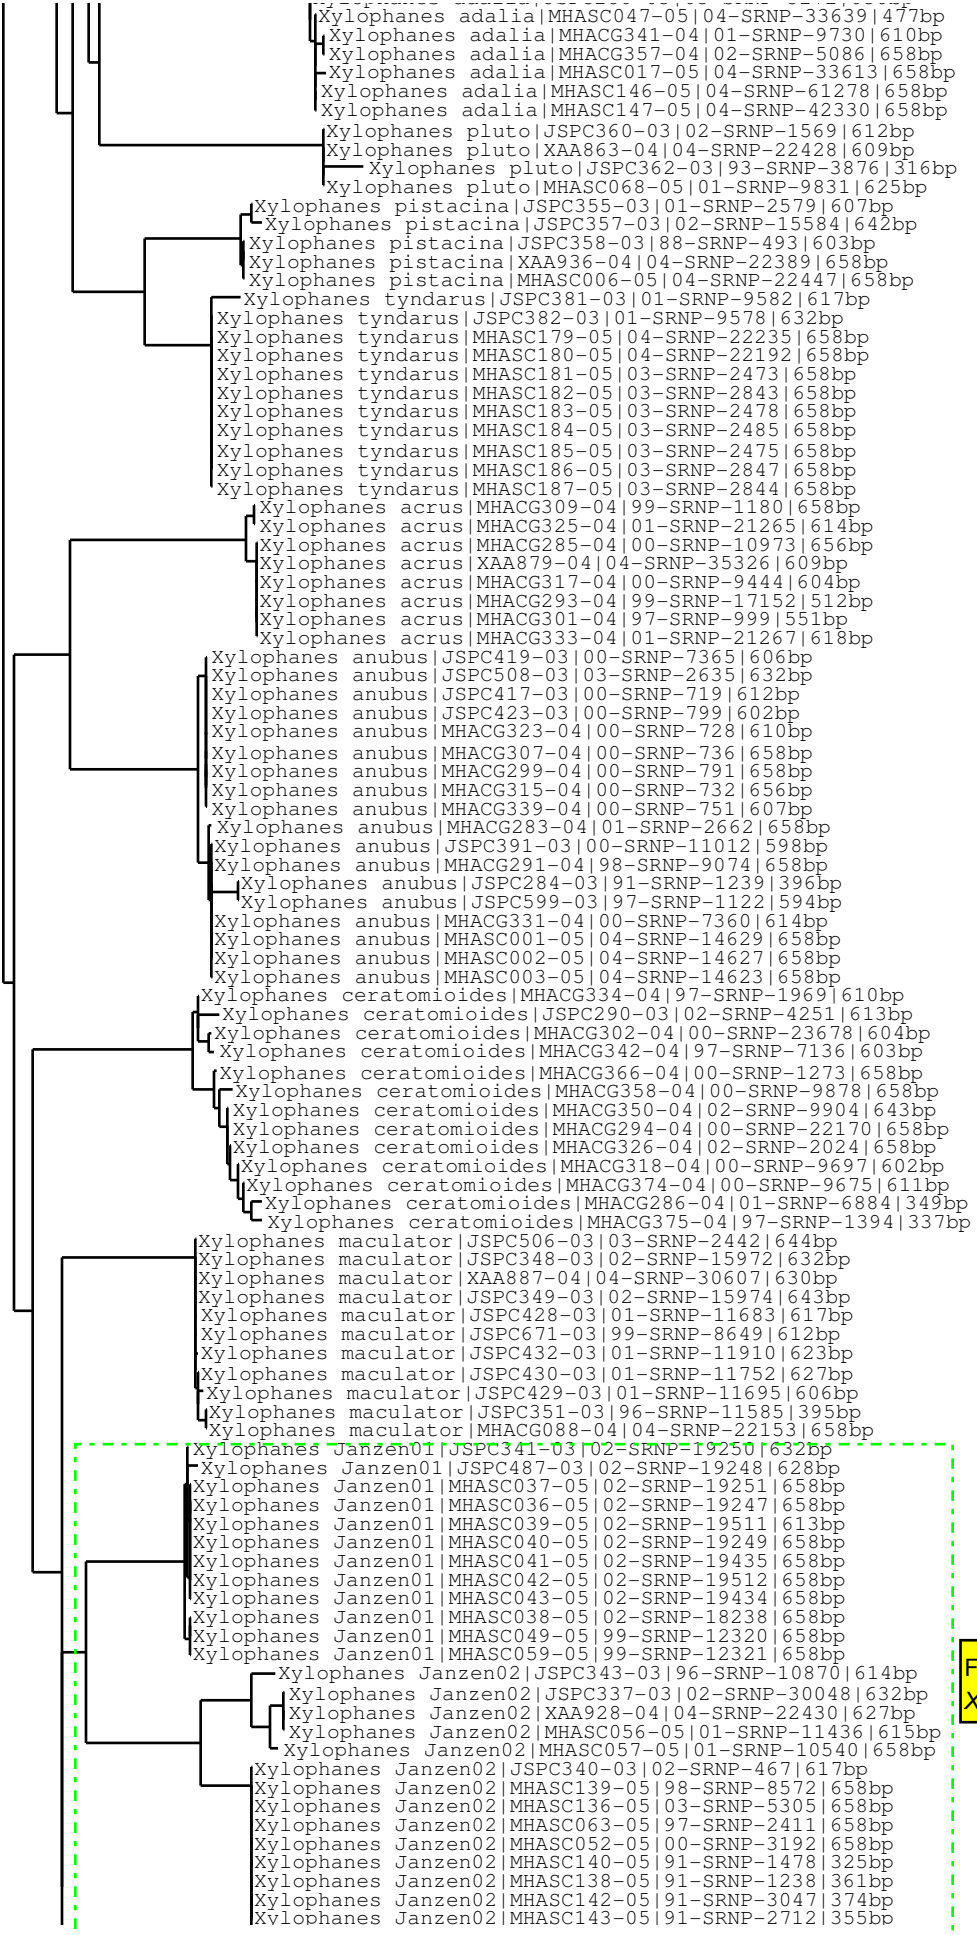

Formerly  
*Xylophanes libya*

*Xylophanes adalia*|MHASC047-05|04-SRNP-33639|477bp  
*Xylophanes adalia*|MHACG341-04|01-SRNP-9730|610bp  
*Xylophanes adalia*|MHACG357-04|02-SRNP-5086|658bp  
*Xylophanes adalia*|MHASC017-05|04-SRNP-33613|658bp  
*Xylophanes adalia*|MHASC146-05|04-SRNP-61278|658bp  
*Xylophanes adalia*|MHASC147-05|04-SRNP-42330|658bp  
*Xylophanes pluto*|JSPC360-03|02-SRNP-1569|612bp  
*Xylophanes pluto*|XAA863-04|04-SRNP-22428|609bp  
*Xylophanes pluto*|JSPC362-03|93-SRNP-3876|316bp  
*Xylophanes pluto*|MHASC068-05|01-SRNP-9831|625bp  
*Xylophanes pistacina*|JSPC355-03|01-SRNP-2579|607bp  
*Xylophanes pistacina*|JSPC357-03|02-SRNP-15584|642bp  
*Xylophanes pistacina*|JSPC358-03|88-SRNP-493|603bp  
*Xylophanes pistacina*|XAA936-04|04-SRNP-22389|658bp  
*Xylophanes pistacina*|MHASC006-05|04-SRNP-22447|658bp  
*Xylophanes tyndarus*|JSPC381-03|01-SRNP-9582|617bp  
*Xylophanes tyndarus*|JSPC382-03|01-SRNP-9578|632bp  
*Xylophanes tyndarus*|MHASC179-05|04-SRNP-22235|658bp  
*Xylophanes tyndarus*|MHASC180-05|04-SRNP-22192|658bp  
*Xylophanes tyndarus*|MHASC181-05|03-SRNP-2473|658bp  
*Xylophanes tyndarus*|MHASC182-05|03-SRNP-2843|658bp  
*Xylophanes tyndarus*|MHASC183-05|03-SRNP-2478|658bp  
*Xylophanes tyndarus*|MHASC184-05|03-SRNP-2485|658bp  
*Xylophanes tyndarus*|MHASC185-05|03-SRNP-2475|658bp  
*Xylophanes tyndarus*|MHASC186-05|03-SRNP-2847|658bp  
*Xylophanes tyndarus*|MHASC187-05|03-SRNP-2844|658bp  
*Xylophanes acrus*|MHACG309-04|99-SRNP-1180|658bp  
*Xylophanes acrus*|MHACG325-04|01-SRNP-21265|614bp  
*Xylophanes acrus*|MHACG285-04|00-SRNP-10973|656bp  
*Xylophanes acrus*|XAA879-04|04-SRNP-35326|609bp  
*Xylophanes acrus*|MHACG317-04|00-SRNP-9444|604bp  
*Xylophanes acrus*|MHACG293-04|99-SRNP-17152|512bp  
*Xylophanes acrus*|MHACG301-04|97-SRNP-999|551bp  
*Xylophanes acrus*|MHACG333-04|01-SRNP-21267|618bp  
*Xylophanes anubus*|JSPC419-03|00-SRNP-7365|606bp  
*Xylophanes anubus*|JSPC508-03|03-SRNP-2635|632bp  
*Xylophanes anubus*|JSPC417-03|00-SRNP-719|612bp  
*Xylophanes anubus*|JSPC423-03|00-SRNP-799|602bp  
*Xylophanes anubus*|MHACG323-04|00-SRNP-728|610bp  
*Xylophanes anubus*|MHACG307-04|00-SRNP-736|658bp  
*Xylophanes anubus*|MHACG299-04|00-SRNP-791|658bp  
*Xylophanes anubus*|MHACG315-04|00-SRNP-732|656bp  
*Xylophanes anubus*|MHACG339-04|00-SRNP-751|607bp  
*Xylophanes anubus*|MHACG283-04|01-SRNP-2662|658bp  
*Xylophanes anubus*|JSPC391-03|00-SRNP-11012|598bp  
*Xylophanes anubus*|MHACG291-04|98-SRNP-9074|658bp  
*Xylophanes anubus*|JSPC284-03|91-SRNP-1239|396bp  
*Xylophanes anubus*|JSPC599-03|97-SRNP-1122|594bp  
*Xylophanes anubus*|MHACG331-04|00-SRNP-7360|614bp  
*Xylophanes anubus*|MHASC001-05|04-SRNP-14629|658bp  
*Xylophanes anubus*|MHASC002-05|04-SRNP-14627|658bp  
*Xylophanes anubus*|MHASC003-05|04-SRNP-14623|658bp  
*Xylophanes ceratomioides*|MHACG334-04|97-SRNP-1969|610bp  
*Xylophanes ceratomioides*|JSPC290-03|02-SRNP-4251|613bp  
*Xylophanes ceratomioides*|MHACG302-04|00-SRNP-23678|604bp  
*Xylophanes ceratomioides*|MHACG342-04|97-SRNP-7136|603bp  
*Xylophanes ceratomioides*|MHACG366-04|00-SRNP-1273|658bp  
*Xylophanes ceratomioides*|MHACG358-04|00-SRNP-9878|658bp  
*Xylophanes ceratomioides*|MHACG350-04|02-SRNP-9904|643bp  
*Xylophanes ceratomioides*|MHACG294-04|00-SRNP-22170|658bp  
*Xylophanes ceratomioides*|MHACG326-04|02-SRNP-2024|658bp  
*Xylophanes ceratomioides*|MHACG318-04|00-SRNP-9697|602bp  
*Xylophanes ceratomioides*|MHACG374-04|00-SRNP-9675|611bp  
*Xylophanes ceratomioides*|MHACG286-04|01-SRNP-6884|349bp  
*Xylophanes ceratomioides*|MHACG375-04|97-SRNP-1394|337bp  
*Xylophanes maculator*|JSPC506-03|03-SRNP-2442|644bp  
*Xylophanes maculator*|JSPC348-03|02-SRNP-15972|632bp  
*Xylophanes maculator*|XAA887-04|04-SRNP-30607|630bp  
*Xylophanes maculator*|JSPC349-03|02-SRNP-15974|643bp  
*Xylophanes maculator*|JSPC428-03|01-SRNP-11683|617bp  
*Xylophanes maculator*|JSPC671-03|99-SRNP-8649|612bp  
*Xylophanes maculator*|JSPC432-03|01-SRNP-11910|623bp  
*Xylophanes maculator*|JSPC430-03|01-SRNP-11752|627bp  
*Xylophanes maculator*|JSPC429-03|01-SRNP-11695|606bp  
*Xylophanes maculator*|JSPC351-03|96-SRNP-11585|395bp  
*Xylophanes maculator*|MHACG088-04|04-SRNP-22153|658bp  
*Xylophanes Janzen01*|JSPC341-03|02-SRNP-19250|632bp  
*Xylophanes Janzen01*|JSPC487-03|02-SRNP-19248|628bp  
*Xylophanes Janzen01*|MHASC037-05|02-SRNP-19251|658bp  
*Xylophanes Janzen01*|MHASC036-05|02-SRNP-19247|658bp  
*Xylophanes Janzen01*|MHASC039-05|02-SRNP-19511|613bp  
*Xylophanes Janzen01*|MHASC040-05|02-SRNP-19249|658bp  
*Xylophanes Janzen01*|MHASC041-05|02-SRNP-19435|658bp  
*Xylophanes Janzen01*|MHASC042-05|02-SRNP-19512|658bp  
*Xylophanes Janzen01*|MHASC043-05|02-SRNP-19434|658bp  
*Xylophanes Janzen01*|MHASC038-05|02-SRNP-18238|658bp  
*Xylophanes Janzen01*|MHASC049-05|99-SRNP-12320|658bp  
*Xylophanes Janzen01*|MHASC059-05|99-SRNP-12321|658bp  
*Xylophanes Janzen02*|JSPC343-03|96-SRNP-10870|614bp  
*Xylophanes Janzen02*|JSPC337-03|02-SRNP-30048|632bp  
*Xylophanes Janzen02*|XAA928-04|04-SRNP-22430|627bp  
*Xylophanes Janzen02*|MHASC056-05|01-SRNP-11436|615bp  
*Xylophanes Janzen02*|MHASC057-05|01-SRNP-10540|658bp  
*Xylophanes Janzen02*|JSPC340-03|02-SRNP-4671|617bp  
*Xylophanes Janzen02*|MHASC139-05|98-SRNP-8572|658bp  
*Xylophanes Janzen02*|MHASC136-05|03-SRNP-5305|658bp  
*Xylophanes Janzen02*|MHASC063-05|97-SRNP-2411|658bp  
*Xylophanes Janzen02*|MHASC052-05|00-SRNP-3192|658bp  
*Xylophanes Janzen02*|MHASC140-05|91-SRNP-1478|325bp  
*Xylophanes Janzen02*|MHASC138-05|91-SRNP-1238|361bp  
*Xylophanes Janzen02*|MHASC142-05|91-SRNP-3047|374bp  
*Xylophanes Janzen02*|MHASC143-05|91-SRNP-2712|355bp

Xylophanes Janzen02|MHASC138-05|91-SRNP-1238|361bp  
 Xylophanes Janzen02|MHASC142-05|91-SRNP-3047|374bp  
 Xylophanes Janzen02|MHASC143-05|91-SRNP-2712|355bp  
 Xylophanes Janzen02|MHASC145-05|91-SRNP-2708|363bp  
 Xylophanes loelia|JSPC353-03|01-SRNP-4377|494bp  
 Xylophanes loelia|JSPC354-03|01-SRNP-4394|583bp  
 Xylophanes loelia|MHACG048-04|04-SRNP-41581|609bp  
 Xylophanes loelia|MHACG910-05|04-SRNP-56257|658bp  
 Xylophanes loelia|MHACG911-05|04-SRNP-42306|658bp  
 Xylophanes loelia|MHACG912-05|04-SRNP-42273|658bp  
 Xylophanes loelia|MHACG913-05|04-SRNP-56191|658bp  
 Xylophanes loelia|MHACG919-05|04-SRNP-42850|658bp  
 Xylophanes loelia|MHASC125-05|04-SRNP-42401|658bp  
 Xylophanes loelia|MHASC126-05|01-SRNP-4376|658bp  
 Xylophanes loelia|MHASC128-05|04-SRNP-56223|658bp  
 Xylophanes loelia|MHASC130-05|04-SRNP-56192|658bp  
 Xylophanes loelia|MHASC133-05|04-SRNP-56413|658bp  
 Xylophanes neoptolemus|MHACG915-05|04-SRNP-41665|658bp  
 Xylophanes neoptolemus|MHACG916-05|04-SRNP-56397|658bp  
 Xylophanes neoptolemus|MHASC129-05|04-SRNP-56292|658bp  
 Xylophanes neoptolemus|MHACG918-05|04-SRNP-56351|658bp  
 Xylophanes neoptolemus|MHACG917-05|04-SRNP-56255|658bp  
 Xylophanes neoptolemus|MHACG914-05|04-SRNP-56263|658bp  
 Xylophanes neoptolemus|MHASC127-05|04-SRNP-56193|634bp  
 Xylophanes neoptolemus|MHASC131-05|04-SRNP-56293|658bp  
 Xylophanes neoptolemus|MHASC132-05|04-SRNP-46796|658bp  
 Xylophanes neoptolemus|MHASC134-05|04-SRNP-56244|658bp  
 Xylophanes neoptolemus|MHASC135-05|04-SRNP-56190|658bp  
 Xylophanes zurcheri|JSPC388-03|02-SRNP-23243|612bp  
 Xylophanes zurcheri|XAA911-04|04-SRNP-1909|658bp  
 Xylophanes zurcheri|MHASC044-05|04-SRNP-30968|658bp  
 Xylophanes zurcheri|MHASC069-05|01-SRNP-1136|658bp  
 Xylophanes zurcheri|MHASC070-05|99-SRNP-793|658bp  
 Xylophanes zurcheri|JSPC387-03|02-SRNP-1084|604bp  
 Xylophanes zurcheri|MHASC071-05|00-SRNP-9850|658bp  
 Xylophanes tersa|JSPC370-03|97-SRNP-2400|625bp  
 Xylophanes tersa|JSPC371-03|98-SRNP-1301|623bp  
 Aleuron carinata|MHACG249-04|01-SRNP-11895|658bp  
 Aleuron carinata|MHACG257-04|00-SRNP-1484|629bp  
 Aleuron carinata|MHACG208-04|91-SRNP-2597|609bp  
 Aleuron carinata|MHACG216-04|91-SRNP-2644|608bp  
 Aleuron carinata|MHACG192-04|91-SRNP-2690|608bp  
 Aleuron carinata|JSPC031-03|97-SRNP-2947|390bp  
 Aleuron carinata|MHACG200-04|91-SRNP-2622|606bp  
 Aleuron carinata|MHACG224-04|91-SRNP-2605|610bp  
 Aleuron carinata|MHACG273-04|91-SRNP-2267|610bp  
 Aleuron carinata|MHACG281-04|95-SRNP-4523|610bp  
 Aleuron chloroptera|MHACG154-04|01-SRNP-10336|658bp  
 Aleuron chloroptera|MHACG146-04|00-SRNP-2808|658bp  
 Aleuron chloroptera|MHACG138-04|00-SRNP-11365|658bp  
 Aleuron chloroptera|MHACG130-04|97-SRNP-2492|658bp  
 Aleuron chloroptera|MHACG097-04|01-SRNP-5979|658bp  
 Aleuron chloroptera|MHACG170-04|99-SRNP-2803|609bp  
 Aleuron chloroptera|JSPC032-03|97-SRNP-5932|535bp  
 Aleuron chloroptera|MHACG178-04|01-SRNP-9905|658bp  
 Aleuron chloroptera|MHACG186-04|91-SRNP-2641|607bp  
 Aleuron iphis|MHACG105-04|81-SRNP-1142|609bp  
 Aleuron iphis|MHACG153-04|98-SRNP-10189|570bp  
 Aleuron iphis|JSPC035-03|95-SRNP-10493|303bp  
 Aleuron iphis|JSPC037-03|02-SRNP-33334|644bp  
 Aleuron iphis|MHACG096-04|97-SRNP-2487|609bp  
 Aleuron iphis|MHACG113-04|00-SRNP-2815|658bp  
 Aleuron iphis|MHACG121-04|01-SRNP-18083|658bp  
 Aleuron iphis|MHACG104-04|98-SRNP-13996|658bp  
 Aleuron iphis|MHACG137-04|94-SRNP-10233|593bp  
 Aleuron iphis|MHACG129-04|98-SRNP-5648|516bp  
 Aleuron iphis|MHACG145-04|95-SRNP-10507|594bp  
 Aleuron iphis|MHACG161-04|95-SRNP-11053|595bp  
 Aleuron iphis|MHACG169-04|95-SRNP-11122|596bp  
 Aleuron iphis|MHACG177-04|95-SRNP-10509|596bp  
 Aleuron iphis|MHACG185-04|95-SRNP-10995|605bp  
 Unzela japix|MHACG308-04|01-SRNP-23417|658bp  
 Unzela japix|MHACG316-04|01-SRNP-24002|600bp  
 Unzela japix|MHACG284-04|00-SRNP-1611|658bp  
 Unzela japix|MHACG300-04|00-SRNP-4276|658bp  
 Unzela japix|JSPC616-03|98-SRNP-14668|606bp  
 Unzela japix|JSPC400-03|00-SRNP-1509|610bp  
 Unzela japix|JSPC272-03|97-SRNP-4334|610bp  
 Unzela japix|JSPC389-03|00-SRNP-02|624bp  
 Unzela japix|MHACG332-04|99-SRNP-7454|615bp  
 Unzela japix|MHACG292-04|03-SRNP-10354|569bp  
 Unzela japix|MHACG348-04|99-SRNP-12787|610bp  
 Unzela japix|MHACG324-04|99-SRNP-7455|610bp  
 Unzela japix|MHACG340-04|98-SRNP-5271|617bp  
 Unzela japix|JSPC415-03|00-SRNP-4535|445bp  
 Unzela japix|MHACG356-04|98-SRNP-14669|377bp  
 Unzela japix|JSPC579-03|91-SRNP-2689|363bp  
 Unzela japix|JSPC578-03|91-SRNP-2688|365bp  
 Unzela japix|MHACG364-04|98-SRNP-13096|392bp  
 Unzela japix|MHACG372-04|98-SRNP-13476|376bp  
 Unzela japix|MHACG373-04|03-SRNP-10353|609bp  
 Unzela pronoe|JSPC405-03|00-SRNP-17663|592bp  
 Unzela pronoe|JSPC276-03|02-SRNP-20213|606bp  
 Unzela pronoe|JSPC475-03|01-SRNP-9774|612bp  
 Unzela pronoe|JSPC437-03|01-SRNP-14631|617bp  
 Unzela pronoe|JSPC409-03|00-SRNP-22169|623bp  
 Unzela pronoe|JSPC411-03|00-SRNP-2685|610bp  
 Unzela pronoe|JSPC274-03|96-SRNP-7206|394bp  
 Unzela pronoe|JSPC594-03|95-SRNP-6264|609bp  
 Unzela pronoe|JSPC598-03|96-SRNP-11969|523bp
