# Supplementary material
Source: PubMed Central journal article supplement (PMC1348015)
Supplement: pnas_0510466103_3.pdf [file pnas_0510466103_3.pdf]

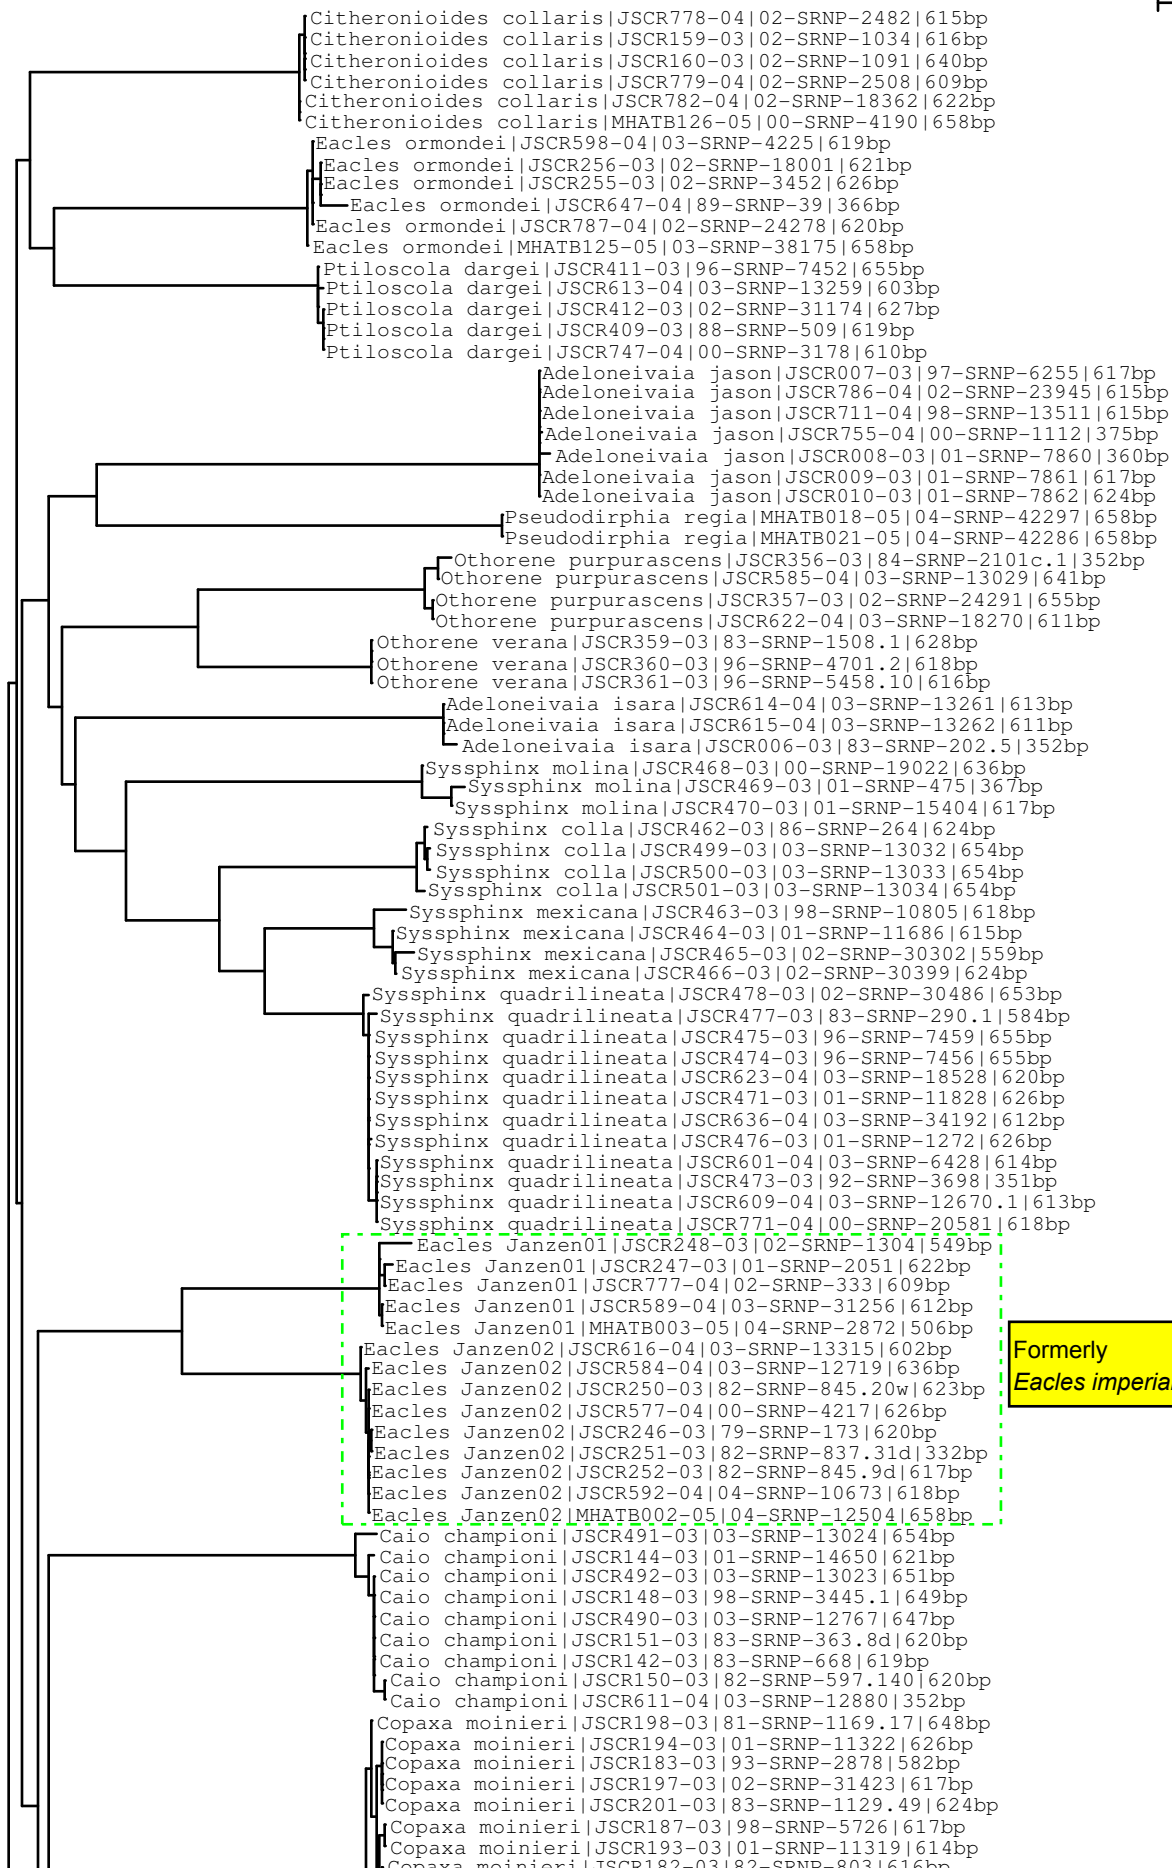

Copaxa moinieri|JSCR187-03|98-SRNP-5726|617bp  
 Copaxa moinieri|JSCR193-03|01-SRNP-11319|614bp  
 Copaxa moinieri|JSCR182-03|82-SRNP-803|616bp  
 Copaxa moinieri|JSCR179-03|81-SRNP-476.10|626bp  
 Copaxa moinieri|JSCR185-03|98-SRNP-5276|618bp  
 Copaxa moinieri|JSCR191-03|01-SRNP-10464|617bp  
 Copaxa moinieri|JSCR189-03|01-SRNP-9502.04|617bp  
 Copaxa moinieri|JSCR190-03|01-SRNP-9869|621bp  
 Copaxa moinieri|JSCR188-03|01-SRNP-9502.01|589bp  
 Copaxa moinieri|JSCR186-03|98-SRNP-5639|367bp  
 Copaxa moinieri|JSCR184-03|98-SRNP-5078|363bp  
 Copaxa moinieri|JSCR196-03|02-SRNP-31422|373bp  
 Copaxa moinieri|JSCR180-03|82-SRNP-259|363bp  
 Copaxa moinieri|JSCR192-03|01-SRNP-10465|366bp  
 Copaxa moinieri|JSCR195-03|01-SRNP-11918|363bp  
 Copaxa moinieri|JSCR200-03|81-SRNP-1169.10|361bp  
 Copaxa moinieri|JSCR202-03|81-SRNP-1169.18|582bp  
 Copaxa moinieri|JSCR211-03|01-SRNP-10326|617bp  
 Copaxa moinieri|JSCR633-04|03-SRNP-30008|609bp  
 Copaxa escalantei|JSCR175-03|02-SRNP-2181|615bp  
 Copaxa escalantei|JSCR176-03|02-SRNP-2183|624bp  
 Copaxa escalantei|JSCR174-03|89-SRNP-61.4|367bp  
 Copaxa escalantei|JSCR712-04|99-SRNP-4723|351bp  
 Copaxa curvilinea|JSCR170-03|01-SRNP-2859|634bp  
 Copaxa curvilinea|JSCR172-03|02-SRNP-18104|610bp  
 Copaxa curvilinea|JSCR171-03|01-SRNP-2864|620bp  
 Copaxa curvilinea|JSCR173-03|02-SRNP-18110|370bp  
 Copaxa rufinans|JSCR213-03|02-SRNP-23222|654bp  
 Copaxa rufinans|JSCR214-03|02-SRNP-23310|644bp  
 Copaxa rufinans|JSCR210-03|01-SRNP-2356|622bp  
 Copaxa rufinans|JSCR205-03|98-SRNP-2765|614bp  
 Copaxa rufinans|JSCR206-03|98-SRNP-15535|366bp  
 Copaxa rufinans|JSCR207-03|98-SRNP-10850|367bp  
 Copaxa rufinans|JSCR212-03|02-SRNP-2392|367bp  
 Copaxa rufinans|JSCR216-03|90-SRNP-139.1|366bp  
 Rothschildia erycina|JSCR627-04|03-SRNP-21400|608bp  
 Rothschildia erycina|JSCR417-03|98-SRNP-13509|613bp  
 Rothschildia erycina|JSCR626-04|03-SRNP-21399|572bp  
 Rothschildia erycina|JSCR416-03|97-SRNP-4583|617bp  
 Rothschildia erycina|JSCR419-03|01-SRNP-10912|402bp  
 Rothschildia erycina|JSCR418-03|01-SRNP-10911|394bp  
 Rothschildia erycina|JSCR674-04|95-SRNP-9512|351bp  
 Rothschildia erycina|JSCR731-04|99-SRNP-11160.09|363bp  
 Rothschildia erycina|JSCR732-04|99-SRNP-10979.34|342bp  
 Rothschildia lebeau|JSCR497-03|03-SRNP-12368|644bp  
 Rothschildia lebeau|JSCR434-03|01-SRNP-9715|609bp  
 Rothschildia lebeau|JSCR431-03|01-SRNP-347|609bp  
 Rothschildia lebeau|JSCR426-03|83-SRNP-670|617bp  
 Rothschildia lebeau|JSCR432-03|01-SRNP-349|617bp  
 Rothschildia lebeau|JSCR438-03|83-SRNP-1049.1|617bp  
 Rothschildia lebeau|JSCR496-03|03-SRNP-12754|632bp  
 Rothschildia lebeau|JSCR617-04|03-SRNP-15136|619bp  
 Rothschildia lebeau|JSCR429-03|97-SRNP-747|618bp  
 Rothschildia lebeau|JSCR435-03|01-SRNP-12285|622bp  
 Rothschildia lebeau|JSCR423-03|82-SRNP-751|361bp  
 Rothschildia lebeau|JSCR427-03|83-SRNP-1136|366bp  
 Rothschildia lebeau|JSCR439-03|83-SRNP-1127.7|617bp  
 Rothschildia lebeau|JSCR618-04|03-SRNP-15491|614bp  
 Rothschildia lebeau|JSCR433-03|01-SRNP-5096|618bp  
 Rothschildia lebeau|JSCR424-03|83-SRNP-50|604bp  
 Rothschildia lebeau|JSCR430-03|98-SRNP-5446|619bp  
 Rothschildia lebeau|JSCR436-03|01-SRNP-15556|617bp  
 Rothschildia lebeau|JSCR756-04|00-SRNP-1188|612bp  
 Rothschildia triloba|JSCR706-04|98-SRNP-3084.13|528bp  
 Rothschildia triloba|JSCR443-03|98-SRNP-2779.07|616bp  
 Rothschildia triloba|JSCR780-04|02-SRNP-2624|609bp  
 Rothschildia triloba|JSCR450-03|02-SRNP-17734|636bp  
 Rothschildia triloba|JSCR669-04|95-SRNP-6064|606bp  
 Rothschildia triloba|JSCR448-03|02-SRNP-2306|624bp  
 Rothschildia triloba|JSCR446-03|01-SRNP-22448|617bp  
 Rothschildia triloba|JSCR442-03|97-SRNP-1135.17|617bp  
 Rothschildia triloba|JSCR444-03|98-SRNP-3084.20|367bp  
 Rothschildia triloba|JSCR445-03|01-SRNP-1838|360bp  
 Rothschildia triloba|JSCR447-03|02-SRNP-2305|366bp  
 Rothschildia triloba|JSCR449-03|02-SRNP-16651|396bp  
 Rothschildia triloba|JSCR753-04|00-SRNP-863|370bp  
 Rothschildia triloba|JSCR788-04|02-SRNP-30265|611bp  
 Copiopteryx semiramis|JSCR493-03|03-SRNP-12407|655bp  
 Copiopteryx semiramis|JSCR494-03|03-SRNP-12763|551bp  
 Copiopteryx semiramis|MHATB140-05|04-SRNP-11101|658bp  
 Copiopteryx semiramis|MHATB141-05|04-SRNP-10799|658bp  
 Dysdaemonia boreas|JSCR243-03|01-SRNP-14508|623bp  
 Dysdaemonia boreas|JSCR606-04|03-SRNP-12367|613bp  
 Dysdaemonia boreas|JSCR242-03|01-SRNP-14498|644bp  
 Dysdaemonia boreas|JSCR608-04|03-SRNP-12371|616bp  
 Dysdaemonia boreas|JSCR773-04|01-SRNP-14491|610bp  
 Dysdaemonia boreas|JSCR241-03|01-SRNP-14481|617bp  
 Dysdaemonia boreas|JSCR774-04|01-SRNP-14506|605bp  
 Titaea tamerlan|JSCR480-03|83-SRNP-242|624bp  
 Titaea tamerlan|JSCR479-03|81-SRNP-112.047|624bp  
 Titaea tamerlan|JSCR599-04|03-SRNP-5800|607bp  
 Titaea tamerlan|JSCR607-04|03-SRNP-12370|622bp  
 Titaea tamerlan|JSCR608-04|03-SRNP-11621|617bp

Titaea tamerlan|JSCR599-04|03-SRNP-5800|607bp  
 Titaea tamerlan|JSCR607-04|03-SRNP-12370|622bp  
 Arsenura armida|JSCR020-03|98-SRNP-11631|617bp  
 Arsenura armida|JSCR022-03|01-SRNP-16623|641bp  
 Arsenura armida|JSCR023-03|01-SRNP-16724|654bp  
 Arsenura armida|JSCR028-03|01-SRNP-21305|621bp  
 Arsenura armida|JSCR026-03|01-SRNP-16863|655bp  
 Arsenura armida|JSCR488-03|03-SRNP-12764|654bp  
 Arsenura armida|JSCR025-03|01-SRNP-16850|620bp  
 Arsenura armida|JSCR489-03|03-SRNP-12765|643bp  
 Arsenura armida|JSCR024-03|01-SRNP-16756|628bp  
 Arsenura armida|JSCR027-03|01-SRNP-21278|625bp  
 Arsenura armida|JSCR031-03|85-SRNP-643.12|583bp  
 Arsenura batesii|JSCR707-04|98-SRNP-3664|621bp  
 Arsenura batesii|JSCR722-04|99-SRNP-1646|612bp  
 Arsenura batesii|JSCR032-03|00-SRNP-4253|628bp  
 Arsenura batesii|MHATB150-05|04-SRNP-23283.01|658bp  
 Arsenura batesii|JSCR033-03|02-SRNP-17937|642bp  
 Arsenura drucei|MHATB134-05|04-SRNP-30576|658bp  
 Arsenura drucei|MHATB135-05|04-SRNP-31519|658bp  
 Arsenura drucei|MHATB136-05|04-SRNP-31518|658bp  
 Arsenura drucei|MHATB137-05|04-SRNP-32844|658bp  
 Arsenura drucei|MHATB142-05|04-SRNP-31523|658bp  
 Arsenura drucei|MHATB143-05|04-SRNP-31452|658bp  
 Arsenura drucei|MHATB155-05|04-SRNP-32136|658bp  
 Arsenura drucei|MHATB139-05|04-SRNP-32638|658bp  
 Arsenura drucei|MHATB152-05|04-SRNP-31798|658bp  
 Arsenura drucei|MHATB154-05|04-SRNP-33355|658bp  
 Arsenura drucei|JSCR570-04|95-SRNP-748|606bp  
 Arsenura drucei|JSCR571-04|98-SRNP-3318|618bp  
 Arsenura drucei|JSCR587-04|03-SRNP-21215|616bp  
 Arsenura drucei|MHATB156-05|04-SRNP-30920|639bp  
 Arsenura drucei|MHATB157-05|04-SRNP-33354|658bp  
 Arsenura drucei|MHATB158-05|04-SRNP-33641|658bp  
 Arsenura sylla|JSCR569-04|93-SRNP-5056|624bp  
 Pseudodirphia menander|JSCR401-03|97-SRNP-1669.1|612bp  
 Pseudodirphia menander|JSCR402-03|97-SRNP-1764|617bp  
 Pseudodirphia menander|JSCR403-03|97-SRNP-1771|617bp  
 Pseudodirphia menander|MHATB014-05|03-SRNP-31607|658bp  
 Pseudodirphia menander|MHATB015-05|03-SRNP-31604|658bp  
 Pseudodirphia menander|JSCR783-04|02-SRNP-19558|611bp  
 Pseudodirphia menander|JSCR404-03|00-SRNP-21823|367bp  
 Pseudodirphia menander|MHATB004-05|04-SRNP-60421|658bp  
 Pseudodirphia menander|MHATB016-05|04-SRNP-33730|581bp  
 Hyperchiria nausica|JSCR312-03|97-SRNP-6969|614bp  
 Hyperchiria nausica|JSCR311-03|97-SRNP-6967|622bp  
 Hyperchiria nausica|JSCR313-03|98-SRNP-6715|618bp  
 Hyperchiria nausica|JSCR314-03|00-SRNP-21197|617bp  
 Hyperchiria nausica|MHATB017-05|04-SRNP-4675|658bp  
 Rhescyntis hippodamia|JSCR413-03|98-SRNP-7679.03|614bp  
 Rhescyntis hippodamia|JSCR661-04|95-SRNP-664|350bp  
 Automeris Janzen04|MHATB138-05|04-SRNP-1543|658bp  
 Automeris Janzen04|MHATB151-05|04-SRNP-21416|658bp  
 Automeris Janzen04|JSCR093-03|01-SRNP-7848|626bp  
 Automeris Janzen04|JSCR090-03|98-SRNP-3710|617bp  
 Automeris Janzen04|JSCR092-03|99-SRNP-163|614bp  
 Automeris Janzen04|JSCR698-04|97-SRNP-6942|612bp  
 Automeris Janzen04|JSCR588-04|03-SRNP-28189|562bp  
 Automeris Janzen04|JSCR743-04|00-SRNP-2231|352bp  
 Automeris Janzen04|MHATB065-05|04-SRNP-55017|658bp  
 Automeris Janzen04|MHATB067-05|04-SRNP-55019|658bp  
 Automeris Janzen04|MHATB077-05|04-SRNP-60320|658bp  
 Automeris Janzen04|MHATB081-05|04-SRNP-60478|658bp  
 Automeris Janzen04|MHATB087-05|04-SRNP-40998|658bp  
 Automeris Janzen04|MHATB089-05|04-SRNP-55850|658bp  
 Automeris Janzen04|MHATB099-05|04-SRNP-55049|658bp  
 Automeris Janzen04|MHATB100-05|04-SRNP-60034|658bp  
 Automeris Janzen04|MHATB110-05|04-SRNP-2177|658bp  
 Automeris Janzen04|MHATB111-05|04-SRNP-32096|658bp  
 Automeris Janzen04|MHATB068-05|03-SRNP-22605|657bp  
 Automeris Janzen04|MHATB074-05|03-SRNP-22609|574bp  
 Automeris Janzen04|MHATB078-05|04-SRNP-60125|658bp  
 Automeris Janzen04|MHATB080-05|04-SRNP-36044|658bp  
 Automeris Janzen04|MHATB084-05|03-SRNP-3431|658bp  
 Automeris Janzen04|MHATB097-05|04-SRNP-55012|658bp  
 Automeris Janzen04|MHATB098-05|04-SRNP-55008.1|658bp  
 Automeris Janzen04|MHATB108-05|04-SRNP-1935|658bp  
 Automeris Janzen04|MHATB109-05|03-SRNP-3435|658bp  
 Automeris Janzen04|MHATB122-05|04-SRNP-31115|658bp  
 Automeris Janzen04|MHATB123-05|04-SRNP-60370|658bp  
 Automeris Janzen04|MHATB117-05|04-SRNP-4984|658bp  
 Automeris Janzen04|MHATB118-05|04-SRNP-60053|658bp  
 Automeris Janzen04|MHATB101-05|04-SRNP-1788|658bp  
 Automeris Janzen04|MHATB102-05|04-SRNP-49105|658bp  
 Automeris Janzen04|MHATB091-05|03-SRNP-3425|658bp  
 Automeris Janzen04|MHATB092-05|04-SRNP-55010|658bp  
 Automeris Janzen04|MHATB082-05|04-SRNP-55013|658bp  
 Automeris Janzen04|MHATB072-05|04-SRNP-4967|658bp  
 Automeris Janzen04|MHATB112-05|04-SRNP-31323|658bp  
 Automeris Janzen04|MHATB114-05|04-SRNP-1653|658bp  
 Automeris Janzen04|MHATB115-05|04-SRNP-60492|658bp  
 Automeris Janzen04|MHATB105-05|04-SRNP-40759|658bp

Formerly  
*Automeris postalbida*

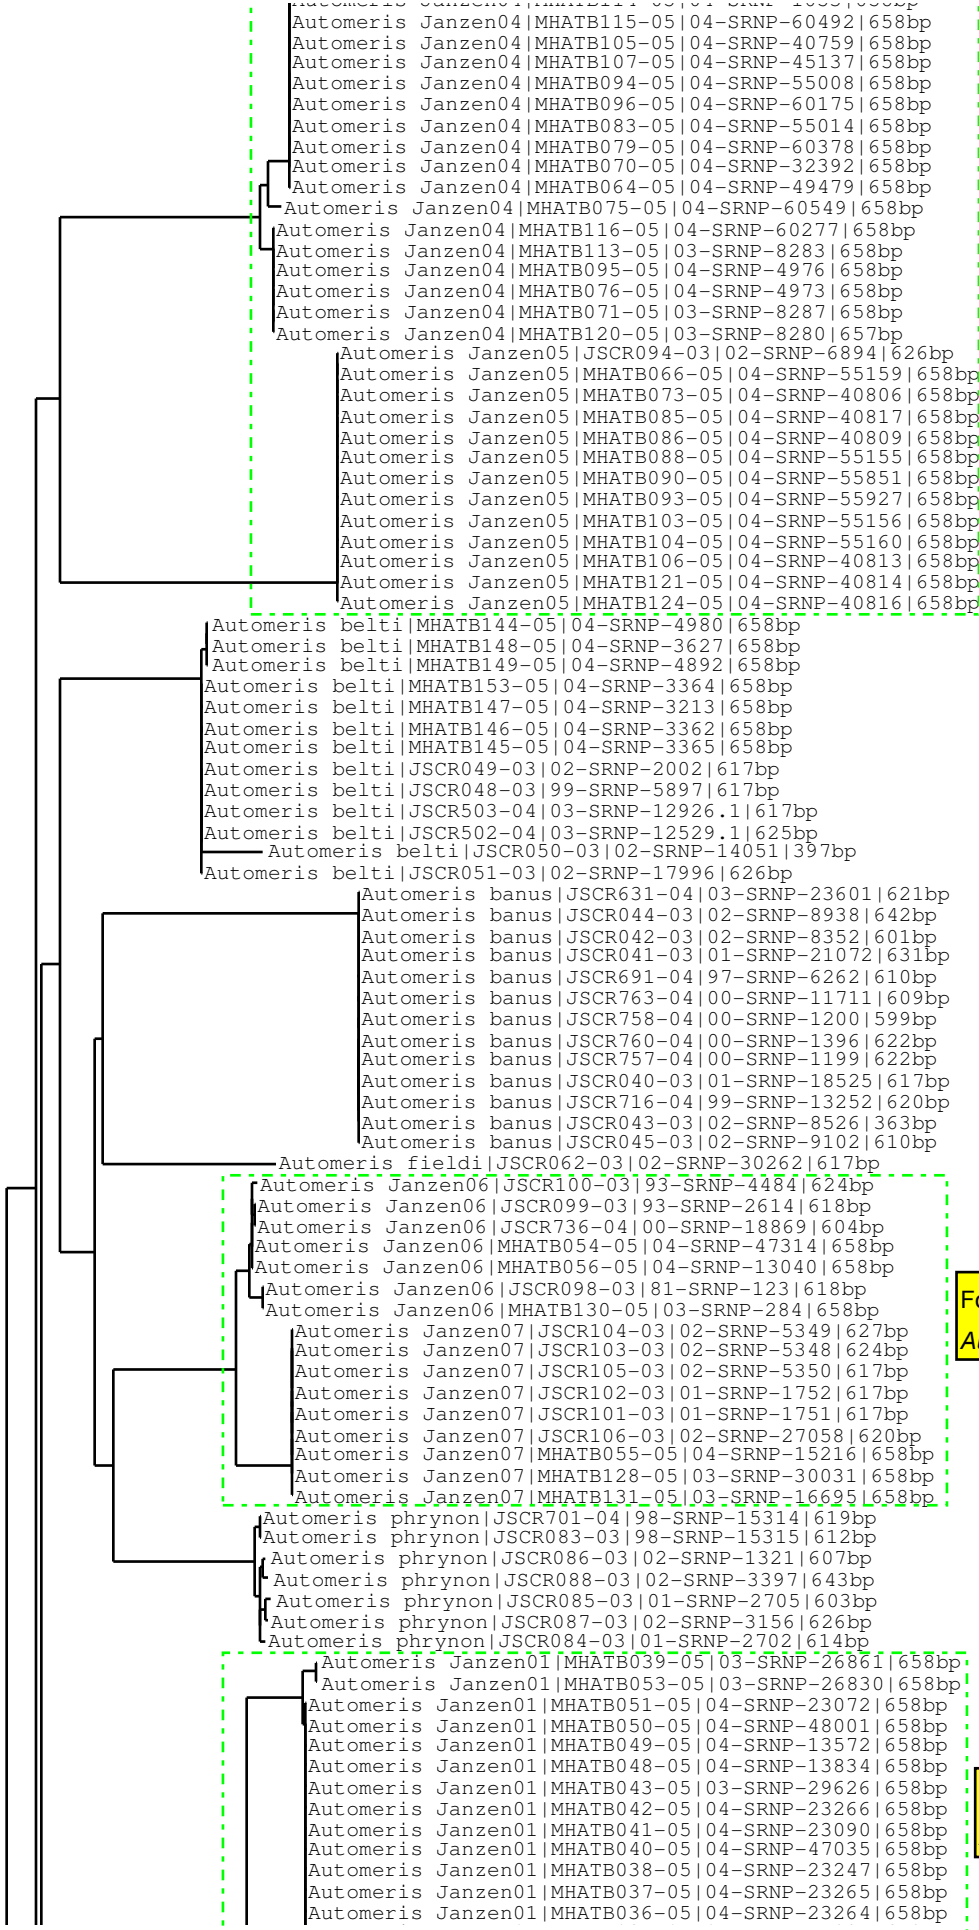

Formerly  
*Automeris postalbida*

Formerly  
*Automeris tridens*

Formerly  
*Automeris zugana*

Automeris Janzen01|MHATB030-05|04-SRNP-2324|658bp  
 Automeris Janzen01|MHATB037-05|04-SRNP-23265|658bp  
 Automeris Janzen01|MHATB036-05|04-SRNP-23264|658bp  
 Automeris Janzen01|MHATB035-05|04-SRNP-47897|658bp  
 Automeris Janzen01|MHATB029-05|04-SRNP-48191|658bp  
 Automeris Janzen01|MHATB028-05|04-SRNP-47893|658bp  
 Automeris Janzen01|MHATB027-05|04-SRNP-13573|658bp  
 Automeris Janzen01|MHATB026-05|04-SRNP-23075|658bp  
 Automeris Janzen01|MHATB023-05|04-SRNP-47036|658bp  
 Automeris Janzen01|MHATB022-05|04-SRNP-23267|658bp  
 Automeris Janzen01|JSCR112-03|92-SRNP-5730|655bp  
 Automeris Janzen01|JSCR137-03|01-SRNP-21492|650bp  
 Automeris Janzen01|JSCR514-04|03-SRNP-29094|614bp  
 Automeris Janzen01|JSCR134-03|01-SRNP-9509.72|617bp  
 Automeris Janzen01|JSCR133-03|01-SRNP-9509.31|617bp  
 Automeris Janzen01|JSCR120-03|99-SRNP-7232|617bp  
 Automeris Janzen01|JSCR116-03|98-SRNP-5556.14|617bp  
 Automeris Janzen01|JSCR578-04|02-SRNP-17861|626bp  
 Automeris Janzen01|JSCR573-04|99-SRNP-11750|626bp  
 Automeris Janzen01|JSCR114-03|97-SRNP-4810.08|615bp  
 Automeris Janzen01|JSCR511-04|03-SRNP-25925|624bp  
 Automeris Janzen01|JSCR135-03|01-SRNP-9509.75|624bp  
 Automeris Janzen01|JSCR516-04|03-SRNP-25916|623bp  
 Automeris Janzen01|JSCR136-03|01-SRNP-9521|621bp  
 Automeris Janzen01|JSCR132-03|01-SRNP-9509.25|621bp  
 Automeris Janzen01|JSCR121-03|99-SRNP-10998|611bp  
 Automeris Janzen01|JSCR122-03|00-SRNP-4182|619bp  
 Automeris Janzen01|JSCR118-03|98-SRNP-5740|605bp  
 Automeris Janzen01|JSCR111-03|91-SRNP-3128|594bp  
 Automeris Janzen01|JSCR113-03|93-SRNP-4406|363bp  
 Automeris Janzen01|JSCR115-03|98-SRNP-5556.01|348bp  
 Automeris Janzen01|JSCR117-03|98-SRNP-5724|367bp  
 Automeris Janzen01|MHATB025-05|04-SRNP-13692|581bp  
 Automeris Janzen01|MHATB052-05|04-SRNP-23082|618bp  
 Automeris Janzen01|MHATB133-05|02-SRNP-17857|658bp  
 Automeris Janzen02|JSCR781-04|02-SRNP-26801|604bp  
 Automeris Janzen02|JSCR124-03|00-SRNP-12934|655bp  
 Automeris Janzen02|JSCR123-03|00-SRNP-12932|626bp  
 Automeris Janzen02|JSCR119-03|99-SRNP-4821|363bp  
 Automeris Janzen02|JSCR126-03|01-SRNP-1039|617bp  
 Automeris Janzen02|JSCR127-03|01-SRNP-1400|617bp  
 Automeris Janzen02|MHATB031-05|04-SRNP-55730|658bp  
 Automeris Janzen02|MHATB032-05|04-SRNP-4898|658bp  
 Automeris Janzen02|MHATB047-05|04-SRNP-1528|658bp  
 Automeris Janzen03|JSCR139-03|02-SRNP-2722|613bp  
 Automeris Janzen03|JSCR582-04|03-SRNP-9819|618bp  
 Automeris Janzen03|JSCR129-03|01-SRNP-2440|617bp  
 Automeris Janzen03|JSCR604-04|03-SRNP-9960|617bp  
 Automeris Janzen03|JSCR583-04|03-SRNP-9965|634bp  
 Automeris Janzen03|JSCR125-03|01-SRNP-463|613bp  
 Automeris Janzen03|JSCR579-04|02-SRNP-21458|628bp  
 Automeris Janzen03|JSCR130-03|01-SRNP-2590|601bp  
 Automeris Janzen03|JSCR128-03|01-SRNP-2346|616bp  
 Automeris Janzen03|JSCR131-03|01-SRNP-2599|362bp  
 Automeris Janzen03|JSCR138-03|02-SRNP-2325|606bp  
 Automeris Janzen03|JSCR603-04|03-SRNP-9952|604bp  
 Automeris Janzen03|JSCR593-04|04-SRNP-40753|608bp  
 Automeris Janzen03|JSCR785-04|02-SRNP-21498|610bp  
 Automeris Janzen03|MHATB024-05|04-SRNP-41840|658bp  
 Automeris Janzen03|MHATB030-05|04-SRNP-3210|658bp  
 Automeris Janzen03|MHATB033-05|04-SRNP-2891|658bp  
 Automeris Janzen03|MHATB034-05|04-SRNP-1816|658bp  
 Automeris Janzen03|MHATB044-05|04-SRNP-3824|658bp  
 Automeris Janzen03|MHATB045-05|04-SRNP-3335|658bp  
 Automeris Janzen03|MHATB046-05|04-SRNP-3543|658bp  
 Leucanella hosmera|JSCR318-03|97-SRNP-11035|617bp  
 Leucanella hosmera|JSCR319-03|98-SRNP-15653|617bp  
 Leucanella hosmera|JSCR320-03|00-SRNP-23645|617bp  
 Leucanella hosmera|JSCR321-03|01-SRNP-21016|617bp  
 Leucanella hosmera|JSCR322-03|01-SRNP-21024|624bp  
 Leucanella hosmera|JSCR727-04|99-SRNP-1946|618bp  
 Hylesia invidiosa|JSCR529-04|01-SRNP-22613|625bp  
 Hylesia invidiosa|JSCR530-04|01-SRNP-22592|624bp  
 Hylesia lineata|JSCR575-04|00-SRNP-19813|626bp  
 Hylesia lineata|JSCR737-04|00-SRNP-19814|613bp  
 Hylesia lineata|JSCR738-04|00-SRNP-20113|583bp  
 Hylesia lineata|JSCR576-04|00-SRNP-20127|626bp  
 Hylesia lineata|JSCR739-04|00-SRNP-20137|611bp  
 Hylesia lineata|JSCR740-04|00-SRNP-20156|608bp  
 Hylesia aeneides|JSCR283-03|01-SRNP-696|613bp  
 Hylesia aeneides|JSCR282-03|01-SRNP-668|365bp  
 Hylesia aeneides|JSCR527-04|01-SRNP-624|362bp  
 Hylesia aeneides|JSCR528-04|97-SRNP-6788|362bp  
 Hylesia aeneides|JSCR741-04|00-SRNP-2198.03|344bp  
 Hylesia Janzen01|JSCR596-04|04-SRNP-882|617bp  
 Hylesia Janzen01|JSCR521-04|02-SRNP-7960|618bp  
 Hylesia Janzen01|JSCR504-04|03-SRNP-30413|624bp  
 Hylesia Janzen01|JSCR519-04|01-SRNP-5407|608bp  
 Hylesia Janzen01|JSCR520-04|01-SRNP-5390|617bp  
 Hylesia Janzen01|JSCR522-04|01-SRNP-4513|600bp  
 Hylesia Janzen01|JSCR634-04|03-SRNP-30397|371bp  
 Hylesia Janzen01|MHATB010-05|03-SRNP-11911.1|658bp  
 Hylesia Janzen01|MHATB011-05|04-SRNP-896|576bp

Formerly  
*Automeris zugana*

Formerly  
*Hylesia dalina*



Hylesia Janzen01|JSCR654-04|03-SRNP-503973|71bp  
Hylesia Janzen01|MHATB010-05|03-SRNP-11911.1|658bp  
Hylesia Janzen01|MHATB011-05|04-SRNP-896|576bp  
Hylesia Janzen01|MHATB012-05|04-SRNP-885|658bp  
Hylesia Janzen02|JSCR523-04|84-SRNP-2007.7|615bp  
Hylesia Janzen02|JSCR525-04|90-SRNP-2047|366bp  
Hylesia continua|JSCR535-04|97-SRNP-1725|618bp  
Hylesia continua|JSCR515-04|03-SRNP-22530|624bp  
Hylesia continua|JSCR536-04|98-SRNP-4644|629bp  
Hylesia continua|JSCR550-04|02-SRNP-17644|617bp  
Hylesia continua|JSCR551-04|02-SRNP-17634|617bp  
Hylesia continua|JSCR539-04|01-SRNP-7568|636bp  
Hylesia continua|JSCR543-04|00-SRNP-21980|638bp  
Hylesia continua|JSCR553-04|01-SRNP-10744|636bp  
Hylesia continua|JSCR541-04|00-SRNP-4106|618bp  
Hylesia continua|JSCR554-04|01-SRNP-10758|617bp  
Hylesia continua|JSCR537-04|97-SRNP-664.83|622bp  
Hylesia continua|JSCR538-04|98-SRNP-2064.05|626bp  
Hylesia continua|JSCR546-04|84-SRNP-14122.58|617bp  
Hylesia continua|JSCR542-04|00-SRNP-4105|624bp  
Hylesia continua|JSCR548-04|84-SRNP-14124.19|622bp  
Hylesia continua|JSCR547-04|84-SRNP-14122.11|622bp  
Hylesia continua|JSCR540-04|01-SRNP-7507|371bp  
Hylesia continua|JSCR555-04|02-SRNP-1743|624bp  
Hylesia continua|JSCR556-04|01-SRNP-10656|617bp  
Hylesia rubrifrons|JSCR560-04|01-SRNP-5004|617bp  
Hylesia rubrifrons|JSCR562-04|00-SRNP-20887|623bp  
Hylesia rubrifrons|JSCR561-04|00-SRNP-11043|616bp  
Hylesia rubrifrons|JSCR563-04|01-SRNP-1769|617bp  
Hylesia rubrifrons|JSCR559-04|99-SRNP-5321|625bp  
Hylesia rubrifrons|JSCR564-04|02-SRNP-2987|627bp  
Hylesia rufipes|JSCR517-04|03-SRNP-20809|639bp  
Hylesia rufipes|JSCR518-04|03-SRNP-20813|626bp  
Hylesia umbrata|JSCR532-04|98-SRNP-13241|617bp  
Hylesia umbrata|JSCR531-04|98-SRNP-13339|614bp  
Hylesia umbrata|JSCR533-04|98-SRNP-13271|366bp  
Hylesia umbrata|JSCR534-04|98-SRNP-13434|608bp  
Lonomia electra|JSCR629-04|03-SRNP-22218|614bp  
Lonomia electra|JSCR744-04|00-SRNP-2269.25|599bp  
Lonomia electra|JSCR717-04|99-SRNP-13441|613bp  
Lonomia electra|JSCR335-03|02-SRNP-8359|630bp  
Lonomia electra|JSCR713-04|99-SRNP-4930|614bp  
Lonomia electra|JSCR332-03|01-SRNP-6160|615bp  
Lonomia electra|JSCR688-04|97-SRNP-1205.12|613bp  
Lonomia electra|JSCR331-03|97-SRNP-1453.02|613bp  
Lonomia electra|JSCR334-03|01-SRNP-6339|622bp  
Lonomia electra|JSCR333-03|01-SRNP-6321|619bp  
Lonomia electra|JSCR745-04|00-SRNP-2315|613bp  
Lonomia electra|JSCR687-04|97-SRNP-1205.07|365bp  
Lonomia electra|JSCR746-04|00-SRNP-2335|583bp  
Lonomia electra|JSCR750-04|00-SRNP-10465|612bp  
Lonomia electra|MHATB013-05|04-SRNP-1366|658bp  
Lonomia rufescens|JSCR338-03|02-SRNP-14360|620bp  
Lonomia rufescens|JSCR339-03|02-SRNP-14361|617bp  
Lonomia rufescens|MHATB005-05|04-SRNP-23729|658bp  
Lonomia rufescens|MHATB007-05|04-SRNP-23745|658bp  
Lonomia rufescens|MHATB009-05|04-SRNP-23381|658bp  
Periga cluacina|JSCR325-03|02-SRNP-7435.18|655bp  
Periga cluacina|JSCR326-03|02-SRNP-7435.23|626bp  
Periga cluacina|MHATB008-05|05-SRNP-30204|658bp  
Automeris io|JSCR660-04|94-SRNP-9983|600bp  
Automeris io|MHATB132-05|01-SRNP-18562|658bp  
Automeris io|JSCR673-04|95-SRNP-7309.2|600bp  
Automeris io|JSCR069-03|01-SRNP-18570|614bp  
Automeris io|JSCR070-03|01-SRNP-18573|617bp  
Automeris io|JSCR071-03|02-SRNP-5748|650bp  
Automeris exigua|MHATB019-05|04-SRNP-41043|658bp  
Automeris exigua|MHATB020-05|04-SRNP-41056|658bp  
Automeris metzlii|JSCR677-04|95-SRNP-11471|611bp  
Automeris metzlii|JSCR748-04|00-SRNP-3955|613bp  
Automeris metzlii|JSCR076-03|96-SRNP-11515.15|361bp  
Automeris metzlii|JSCR077-03|99-SRNP-10818|360bp  
Automeris metzlii|JSCR078-03|01-SRNP-2325|617bp  
Automeris metzlii|JSCR079-03|01-SRNP-2332|613bp  
Molippa nibasa|JSCR574-04|00-SRNP-8197|617bp  
Molippa nibasa|JSCR343-03|97-SRNP-2894|616bp  
Molippa nibasa|JSCR342-03|95-SRNP-4559.16|580bp  
Molippa nibasa|JSCR654-04|93-SRNP-8460|579bp  
Molippa nibasa|JSCR666-04|95-SRNP-4559.2|576bp  
Molippa nibasa|JSCR735-04|00-SRNP-16213|602bp  
Molippa simillima|JSCR344-03|00-SRNP-10963|362bp  
Molippa simillima|JSCR346-03|01-SRNP-21244|628bp  
Molippa simillima|JSCR345-03|00-SRNP-10965|619bp  
Molippa simillima|JSCR347-03|01-SRNP-21258|618bp  
Molippa simillima|JSCR775-04|01-SRNP-21114|522bp  
Molippa tusina|JSCR351-03|02-SRNP-2669|362bp  
Molippa tusina|JSCR350-03|01-SRNP-2033|622bp  
Molippa tusina|JSCR600-04|03-SRNP-5808|616bp  
Molippa tusina|JSCR349-03|01-SRNP-2029|603bp  
Molippa tusina|JSCR761-04|00-SRNP-11586|351bp  
Molippa tusina|JSCR762-04|00-SRNP-11590|603bp  
Dirphia horcana|JSCR235-03|00-SRNP-10668|616bp  
Dirphia horcana|JSCR233-03|98-SRNP-3648|625bp

Molippa tusina|JSCR762-04|00-SRNP-11590|603bp  
 Dirphia horcana|JSCR235-03|00-SRNP-10668|616bp  
 Dirphia horcana|JSCR233-03|98-SRNP-3648|625bp  
 Dirphia horcana|JSCR236-03|02-SRNP-23749|624bp  
 Citheronia bellavista|JSCR157-03|82-SRNP-127c|617bp  
 Citheronia bellavista|JSCR158-03|82-SRNP-127A|619bp  
 Citheronia bellavista|JSCR154-03|97-SRNP-6251|614bp  
 Citheronia bellavista|MHATB001-05|04-SRNP-22518|658bp  
 Citheronia lobesis|JSCR161-03|01-SRNP-14816|623bp  
 Citheronia lobesis|JSCR164-03|02-SRNP-12701|629bp  
 Citheronia lobesis|JSCR163-03|01-SRNP-15453|625bp  
 Citheronia lobesis|JSCR162-03|01-SRNP-15391|625bp  
 Citheronia lobesis|JSCR681-04|96-SRNP-5448|370bp  
 Citheronia lobesis|MHATB127-05|98-SRNP-8880|658bp  
 Schausiella santarosensis|JSCR457-03|97-SRNP-2427.07|593bp  
 Schausiella santarosensis|JSCR456-03|96-SRNP-5649|624bp  
 Schausiella santarosensis|JSCR458-03|01-SRNP-14905|578bp  
 Schausiella santarosensis|JSCR459-03|02-SRNP-11397|624bp  
 Schausiella santarosensis|JSCR460-03|02-SRNP-11504|626bp  
 Schausiella santarosensis|JSCR461-03|02-SRNP-11771|643bp  
 Dirphia avia|JSCR228-03|95-SRNP-4658.2|655bp  
 Dirphia avia|JSCR227-03|93-SRNP-3318.8|618bp  
 Dirphia avia|JSCR226-03|83-SRNP-121|624bp  
 Dirphia avia|JSCR645-04|87-SRNP-612|339bp  
 Dirphia avia|JSCR650-04|89-SRNP-576.1|348bp  
 Dirphia avia|MHATB006-05|04-SRNP-12940|658bp  
 Periphoba arcaeii|JSCR495-03|03-SRNP-5420|655bp  
 Periphoba arcaeii|JSCR392-03|01-SRNP-23549|617bp  
 Periphoba arcaeii|JSCR391-03|01-SRNP-15403|601bp  
 Periphoba arcaeii|JSCR377-03|87-SRNP-1509|581bp  
 Periphoba arcaeii|JSCR395-03|02-SRNP-27379|625bp  
 Periphoba arcaeii|JSCR624-04|03-SRNP-20879|592bp  
 Periphoba arcaeii|JSCR383-03|97-SRNP-4722.14|605bp  
 Periphoba arcaeii|JSCR393-03|02-SRNP-13070|654bp  
 Periphoba arcaeii|JSCR389-03|00-SRNP-22292|625bp  
 Periphoba arcaeii|JSCR388-03|98-SRNP-5996|618bp  
 Periphoba arcaeii|JSCR605-04|03-SRNP-10740|622bp  
 Periphoba arcaeii|JSCR394-03|02-SRNP-13071|617bp  
 Periphoba arcaeii|JSCR386-03|97-SRNP-11141|617bp  
 Periphoba arcaeii|JSCR385-03|97-SRNP-5406.06|617bp  
 Periphoba arcaeii|JSCR375-03|83-SRNP-1130|617bp  
 Periphoba arcaeii|JSCR378-03|90-SRNP-942|616bp  
 Periphoba arcaeii|JSCR390-03|01-SRNP-606|616bp  
 Periphoba arcaeii|JSCR379-03|90-SRNP-945|615bp  
 Periphoba arcaeii|JSCR382-03|97-SRNP-4722.02|614bp  
 Periphoba arcaeii|JSCR381-03|90-SRNP-1702.1|366bp  
 Periphoba arcaeii|JSCR380-03|90-SRNP-1514.2|360bp  
 Periphoba arcaeii|JSCR376-03|83-SRNP-1488|360bp  
 Periphoba arcaeii|JSCR373-03|81-SRNP-1081|360bp  
 Periphoba arcaeii|JSCR374-03|82-SRNP-518|351bp  
 Periphoba arcaeii|JSCR384-03|97-SRNP-4922|367bp  
 Periphoba arcaeii|JSCR387-03|98-SRNP-5385|367bp  
 Periphoba arcaeii|JSCR396-03|82-SRNP-765.8|615bp  
 Periphoba arcaeii|JSCR620-04|03-SRNP-16986|620bp  
 Periphoba arcaeii|JSCR770-04|00-SRNP-22294|622bp  
 Gamelia Janzen01|JSCR263-03|01-SRNP-7342|621bp  
 Gamelia Janzen01|JSCR267-03|01-SRNP-7877|622bp  
 Gamelia Janzen01|JSCR508-04|03-SRNP-23371|610bp  
 Gamelia Janzen01|JSCR509-04|03-SRNP-22467|615bp  
 Gamelia Janzen01|JSCR506-04|03-SRNP-22469|612bp  
 Gamelia Janzen01|JSCR507-04|03-SRNP-22468|617bp  
 Gamelia Janzen01|JSCR505-04|03-SRNP-22578|617bp  
 Gamelia Janzen01|JSCR260-03|01-SRNP-815|516bp  
 Gamelia Janzen01|JSCR581-04|03-SRNP-8750|348bp  
 Gamelia Janzen01|JSCR586-04|03-SRNP-21049|641bp  
 Gamelia Janzen02|JSCR272-03|02-SRNP-30195|616bp  
 Gamelia Janzen02|JSCR275-03|02-SRNP-34013|655bp  
 Gamelia Janzen02|JSCR270-03|02-SRNP-29905|626bp  
 Gamelia Janzen02|JSCR273-03|02-SRNP-30197|614bp  
 Gamelia Janzen02|JSCR268-03|02-SRNP-5960|537bp  
 Gamelia Janzen02|JSCR271-03|02-SRNP-30194|431bp  
 Gamelia Janzen02|JSCR274-03|02-SRNP-33837|643bp  
 Gamelia Janzen02|JSCR510-04|03-SRNP-21304|536bp  
 Gamelia Janzen02|JSCR590-04|04-SRNP-21149|587bp  
 Gamelia Janzen02|JSCR591-04|04-SRNP-21150|599bp  
 Gamelia Janzen02|JSCR594-04|04-SRNP-21454|611bp  
 Automeris celata|JSCR055-03|99-SRNP-5294|626bp  
 Automeris pallidior|MHATB058-05|04-SRNP-48213|547bp  
 Automeris pallidior|MHATB059-05|03-SRNP-30288|571bp  
 Automeris pallidior|JSCR635-04|03-SRNP-30586|613bp  
 Automeris pallidior|JSCR512-04|03-SRNP-30091|617bp  
 Automeris pallidior|JSCR513-04|03-SRNP-30093|645bp  
 Automeris pallidior|MHATB057-05|04-SRNP-47013|658bp  
 Automeris pallidior|MHATB060-05|04-SRNP-48026|658bp  
 Automeris pallidior|MHATB061-05|03-SRNP-38207|658bp  
 Automeris pallidior|MHATB062-05|04-SRNP-47008|658bp  
 Automeris pallidior|MHATB063-05|04-SRNP-47011|658bp  
 Paradirphia winifredae|JSCR728-04|99-SRNP-17013|612bp  
 Paradirphia winifredae|JSCR369-03|01-SRNP-7828|625bp  
 Paradirphia winifredae|JSCR370-03|01-SRNP-7834|635bp  
 Paradirphia winifredae|JSCR729-04|99-SRNP-17022|348bp

Formerly  
Gamelia musta
